# Supplementary material
Source: publisher figshare collection journal article supplement (https://tandf.figshare.com/ndownloader/files/36573859)
Supplement: Supplementary file 1 [file 36573859]

**Supplementary**

**FROM-GLC Plus: Toward** **near real-time and multi-resolution land cover mapping**

Le Yu1,2,*, Zhenrong Du1, Runmin Dong1, Juepeng Zheng1, Ying Tu1, Xin Chen1, Pengyu Hao3, Bo Zhong4, Dailiang Peng4, Jiyao Zhao1, Xiyu Li1, Jianyu Yang5, Haohuan Fu1, Guangwen Yang6, Peng Gong2,7

1 Department of Earth System Science, Ministry of Education Key Laboratory for Earth System Modeling, Institute for Global Change Studies, Tsinghua University, Beijing 100084, China

2 Ministry of Education Ecological Field Station for East Asian Migratory Birds, Department of Earth System Science, Tsinghua University, Beijing 100084, China

3 Food and Agriculture Organization of the United Nations, Viale delle Terme di Caracalla, 00153 Rome, Italy

4 Key Laboratory of Digital Earth Science, Aerospace Information Research Institute, Chinese Academy of Sciences, Beijing 100094, China.

5 College of Land Science and Technology, China Agricultural University, Beijing 100193, China

6 Department of Computer Science and Technology, Tsinghua University, Beijing 100084, China

7 Department of Geography and Department of Earth Sciences, University of Hong Kong, Hong Kong 999077, China

**Correspondence to*: Le Yu (leyu@tsinghua.edu.cn)

| 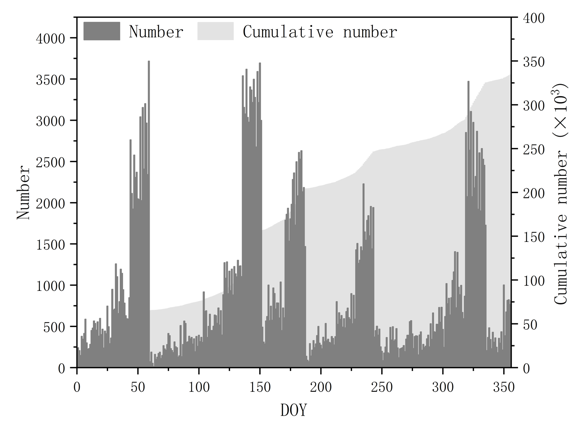 | 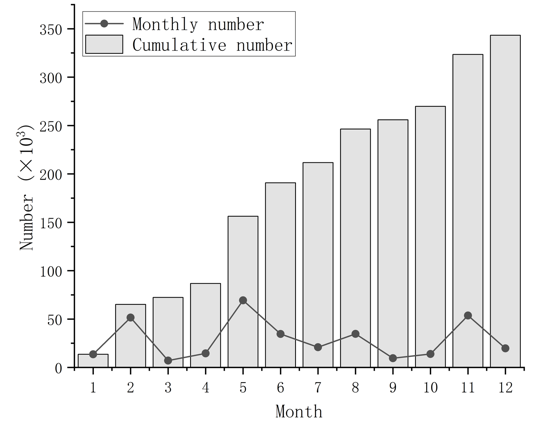 |
| --- | --- |
| (a) | |
| 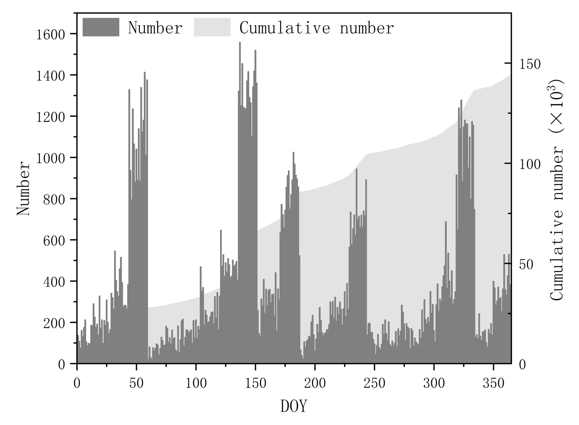 | 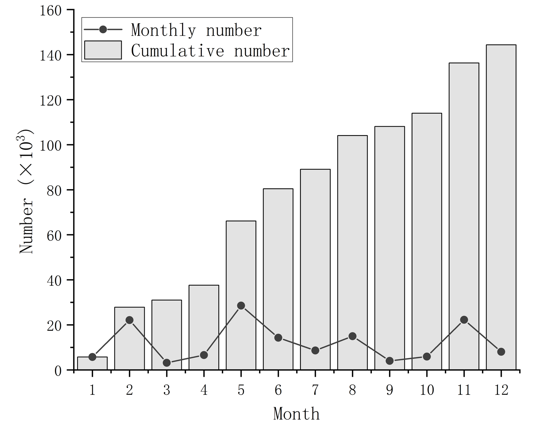 |
| (b) | |

Figure S1. Time frequency histogram of (a) training and (b) validation samples units of the first all-season sample set (FAST).

| 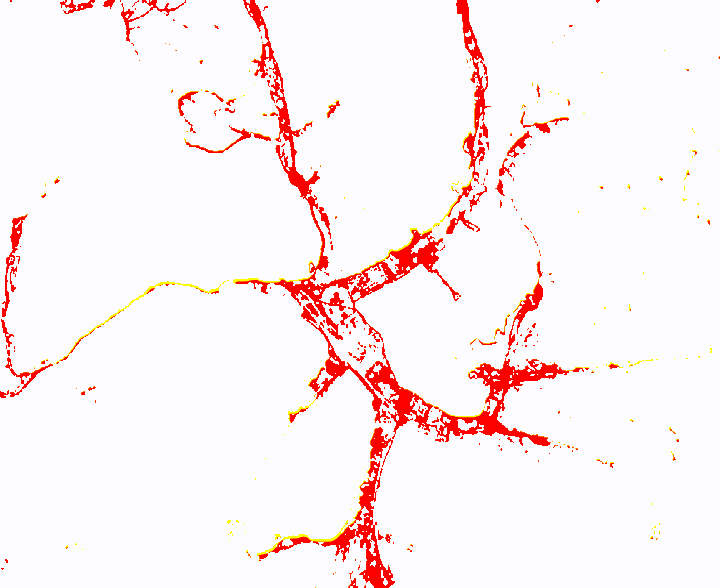 | 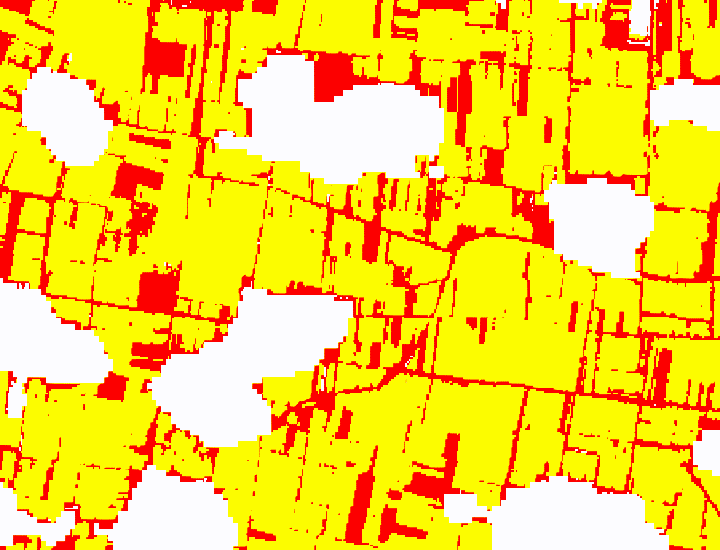 | 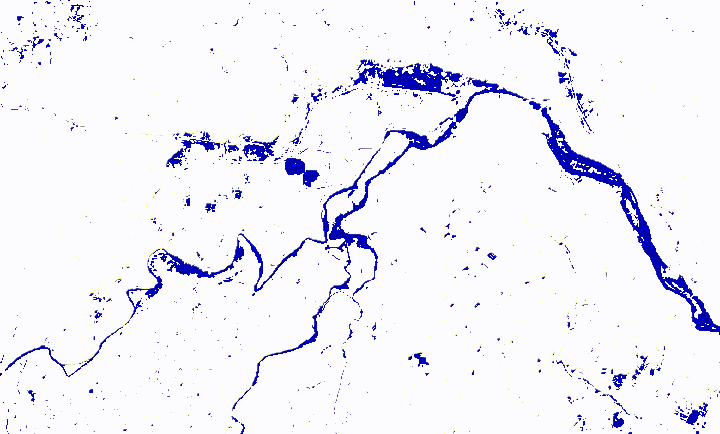 |
| --- | --- | --- |
| 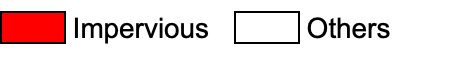 | 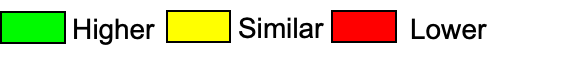 | 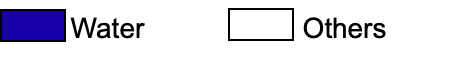 |
| (a) | (b) | (c) |

Figure S2. GIF for examples in Figure 6. (a) Monthly impervious area changes in Zhangjiakou Olympic Village, Hebei, China, 2019. (b) Ten-day crop monitoring in Heze, Shandong, China, 2020. The black areas in the figure are non-cropland. (c) Daily water body changes in Wangjiaba, Anhui, China, 2020.


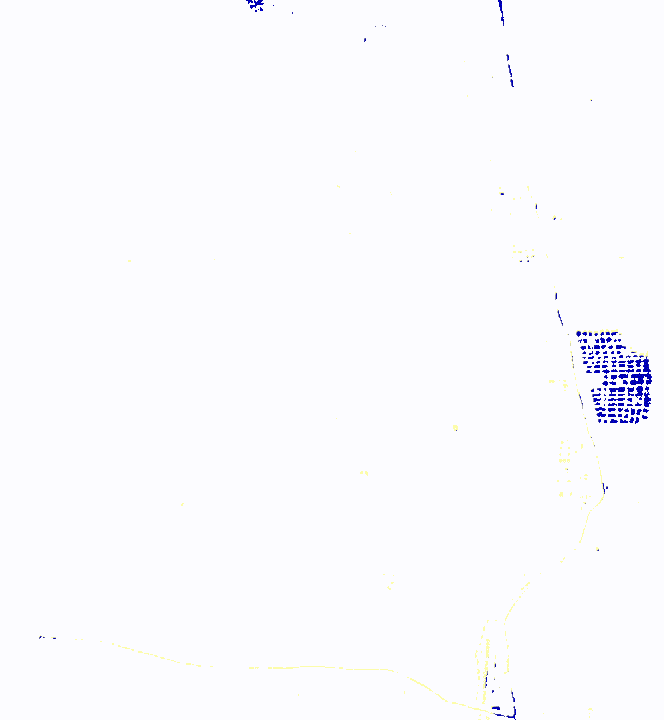

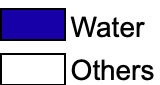


Figure S3. GIF for example in Figure 7: the daily monitoring of water from a rainstorm in Weishi, Henan, China, 2021.

| 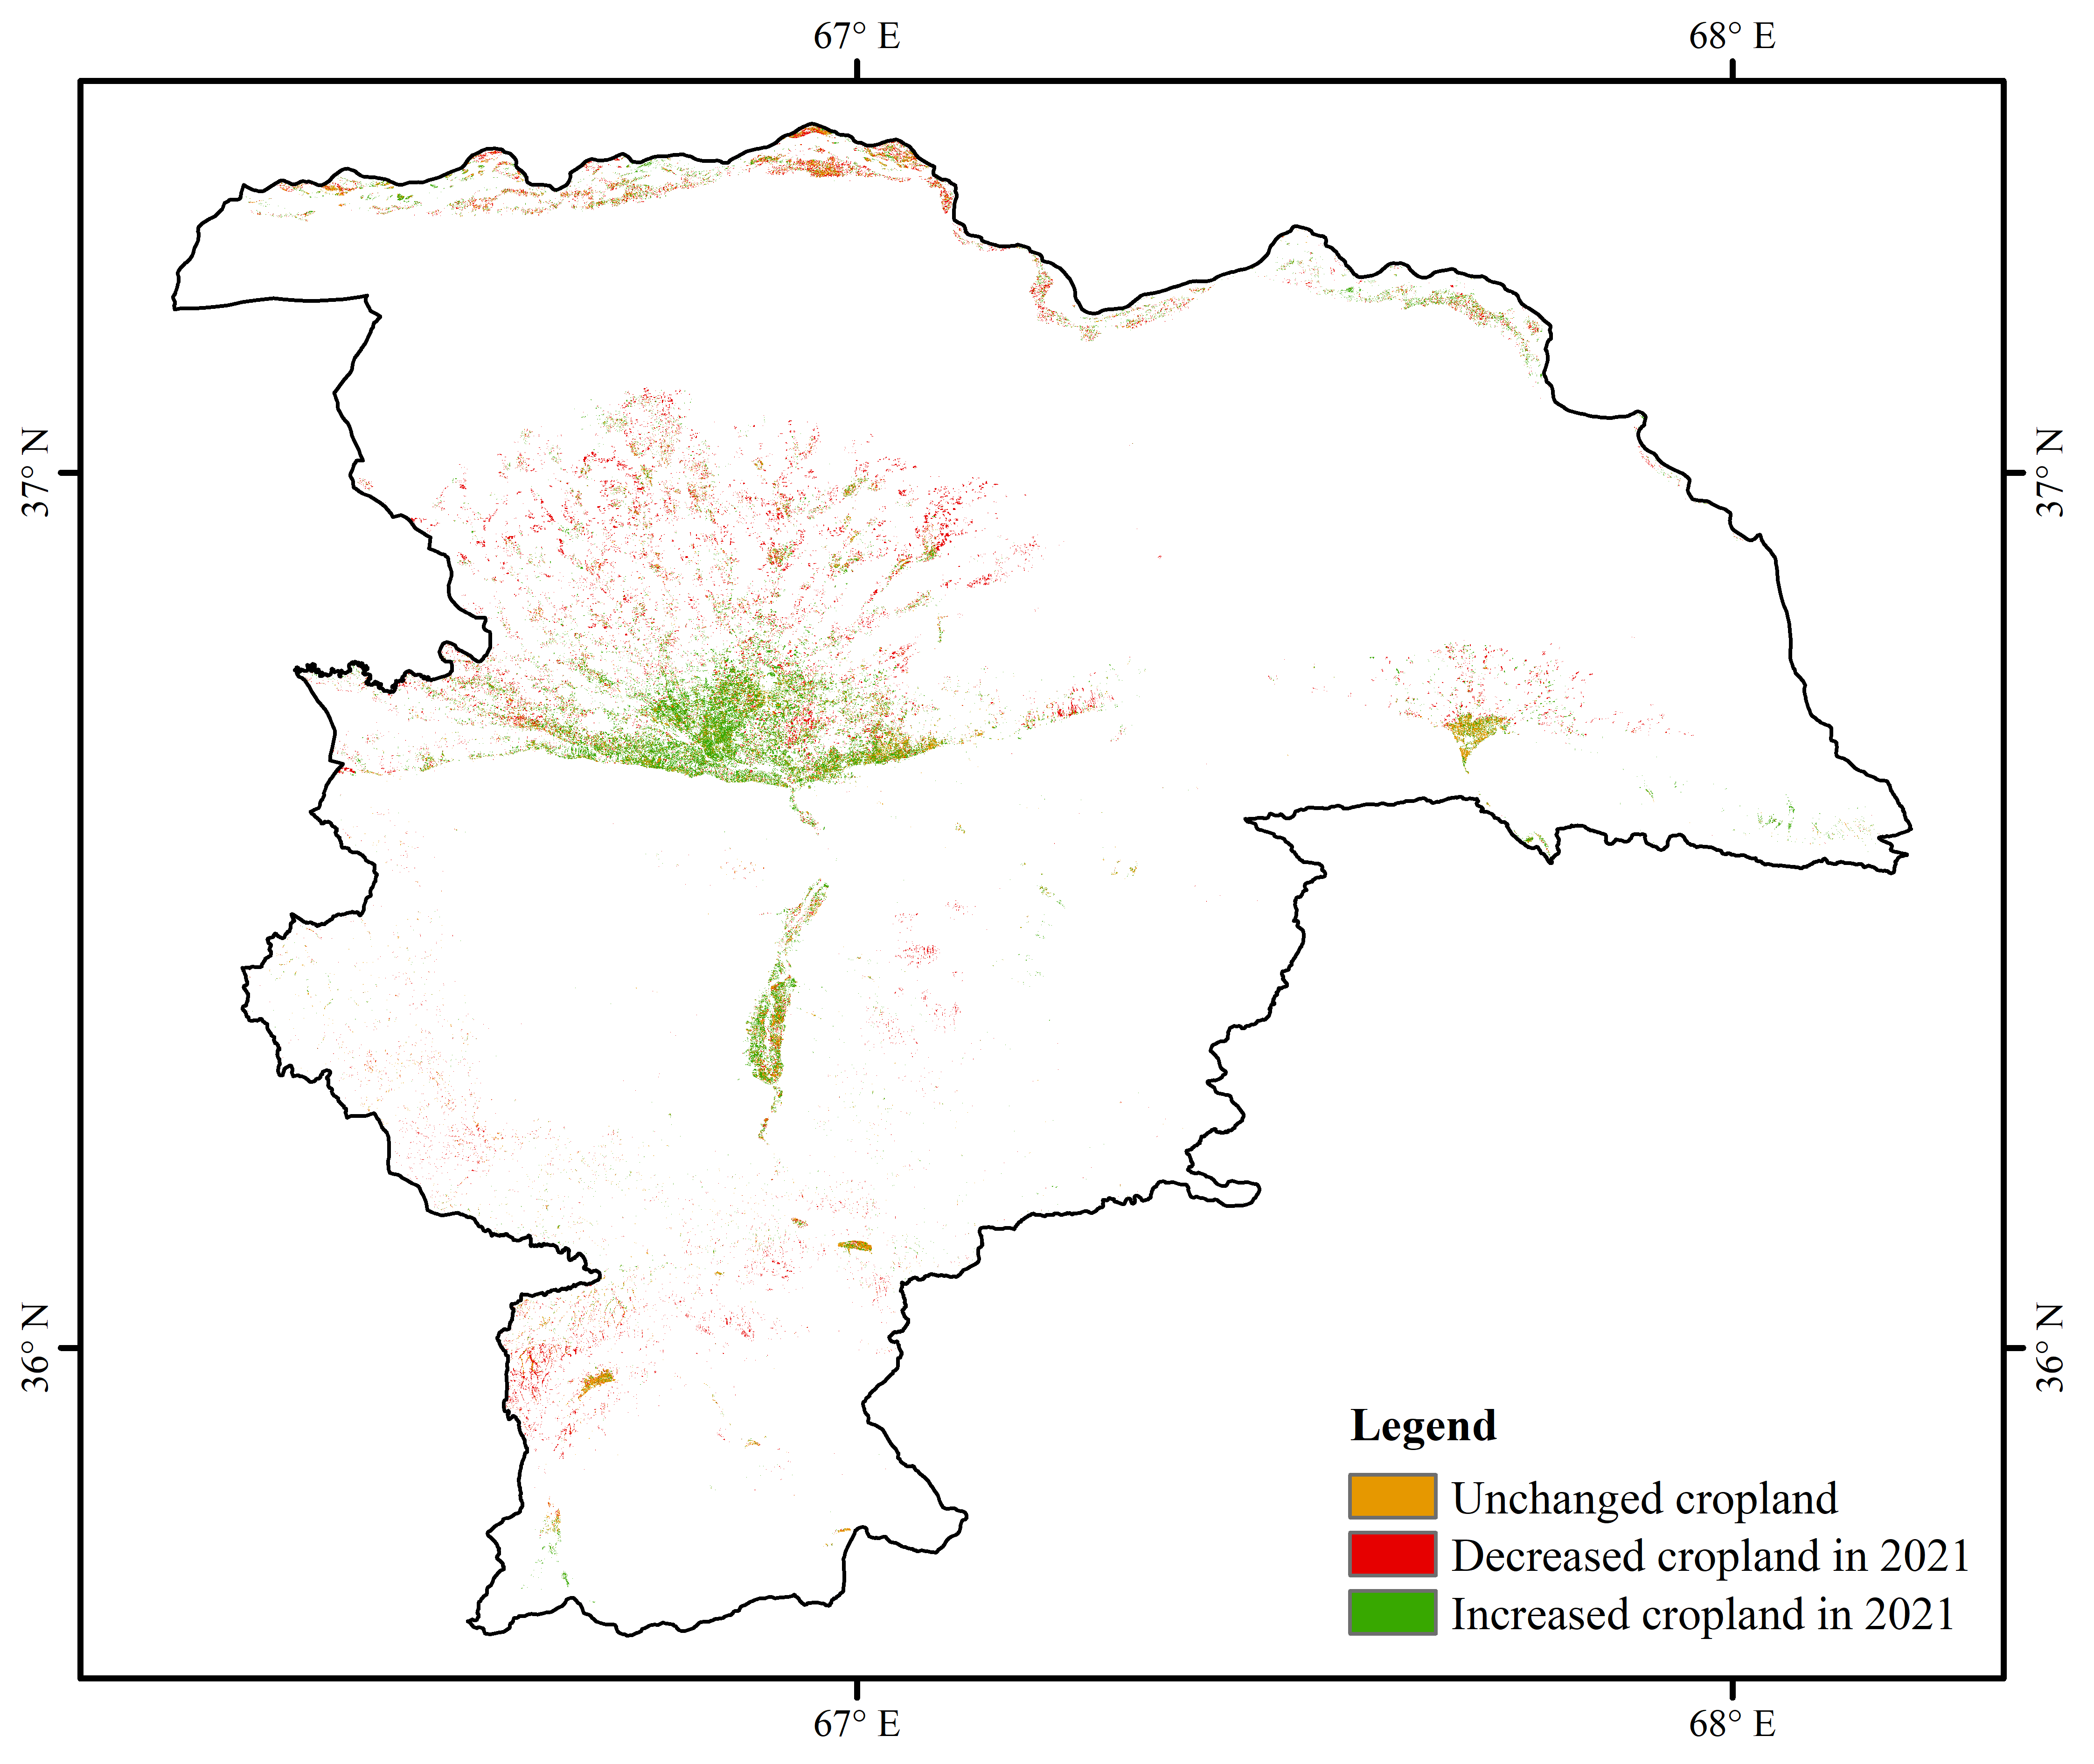 | 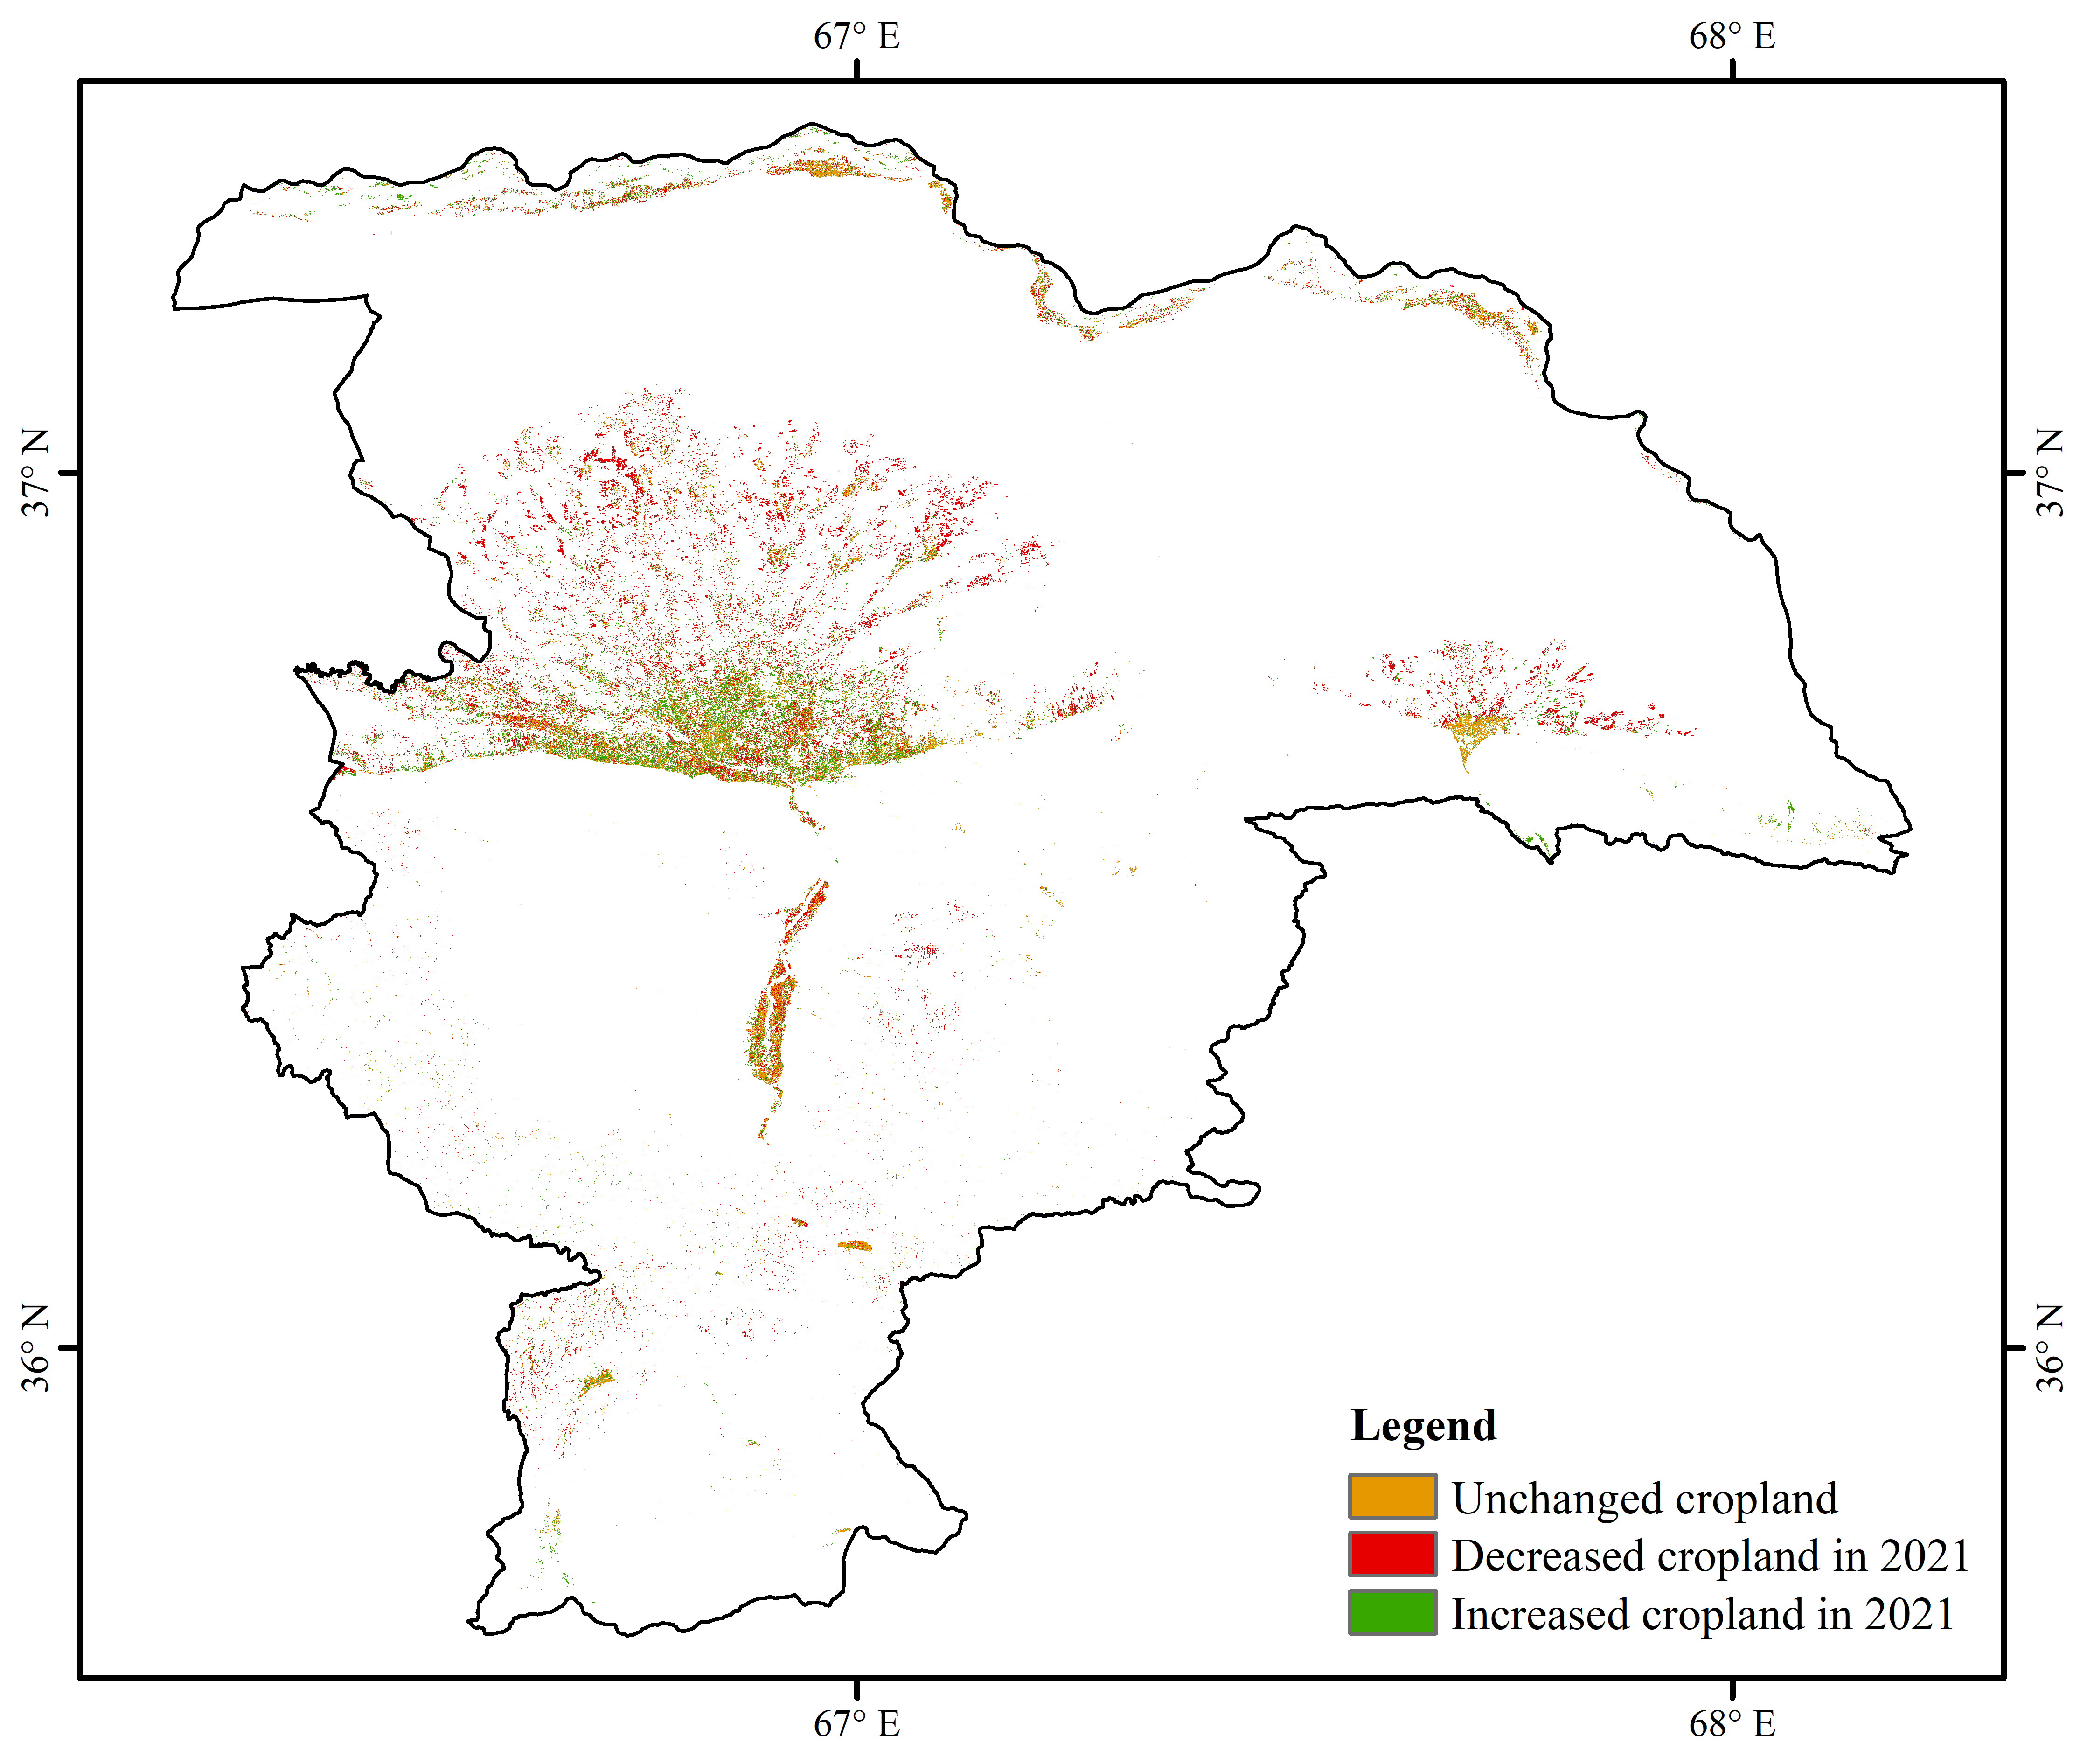 |
| --- | --- |
| January | February |
| 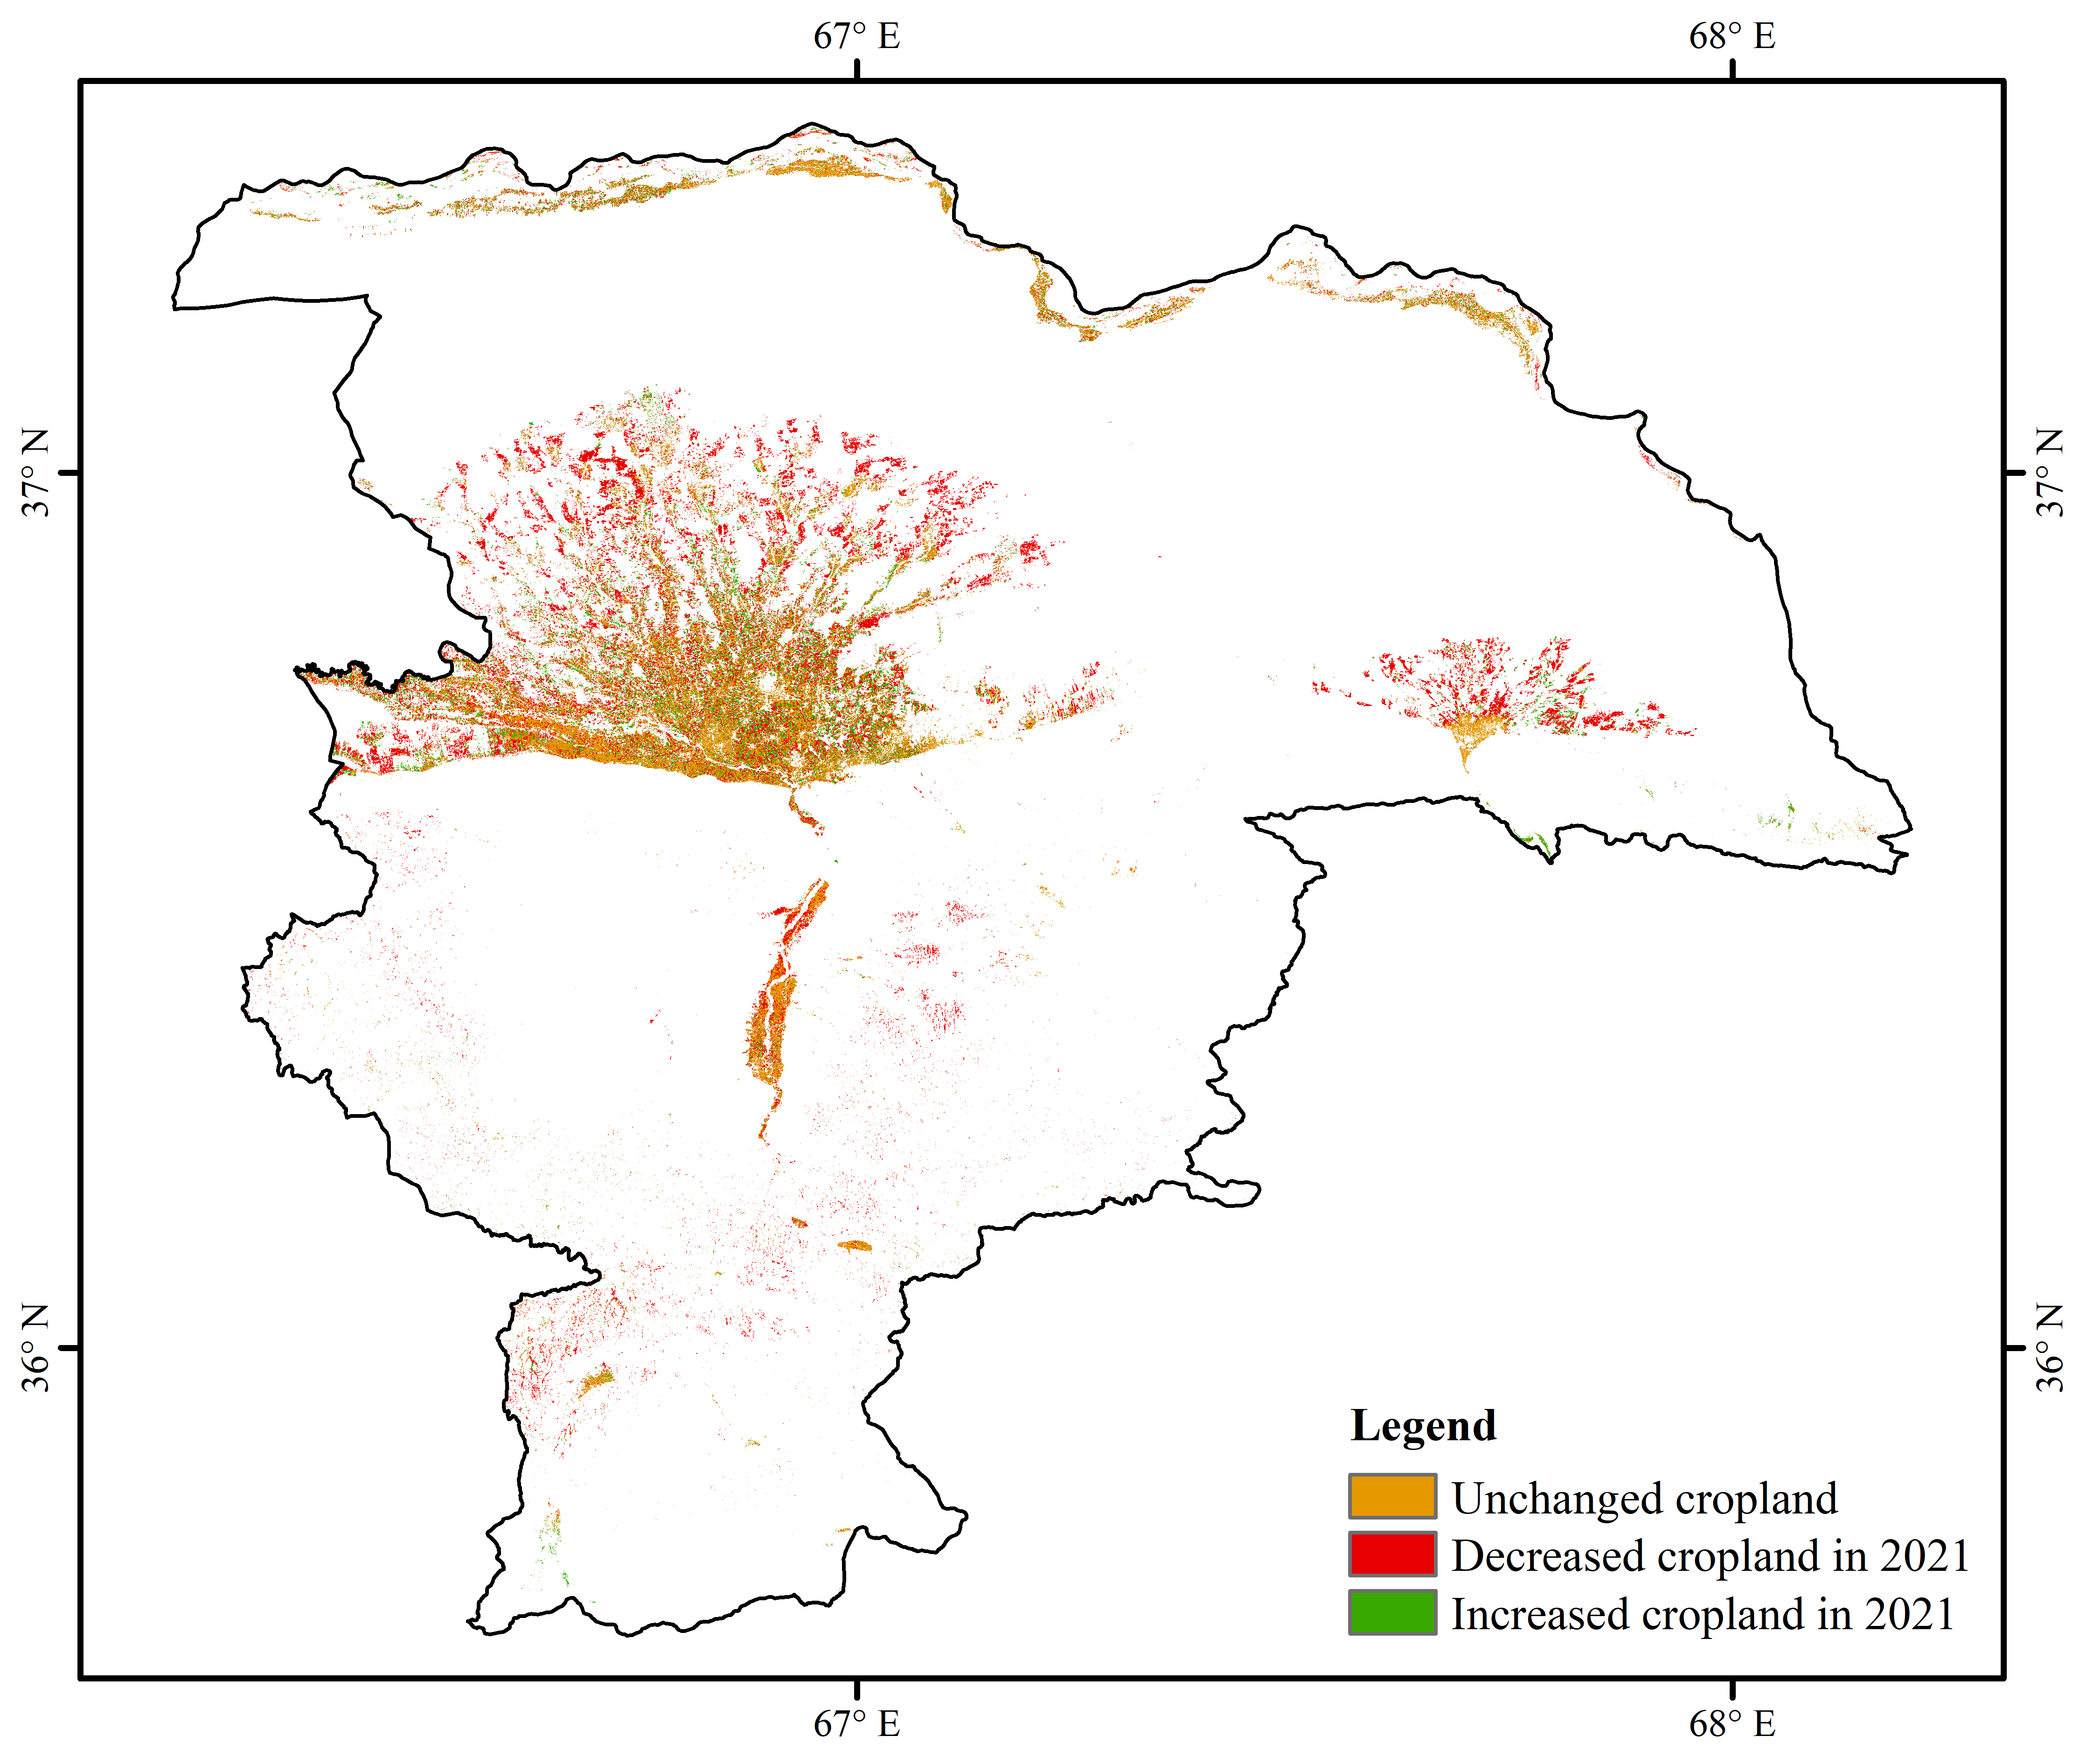 | 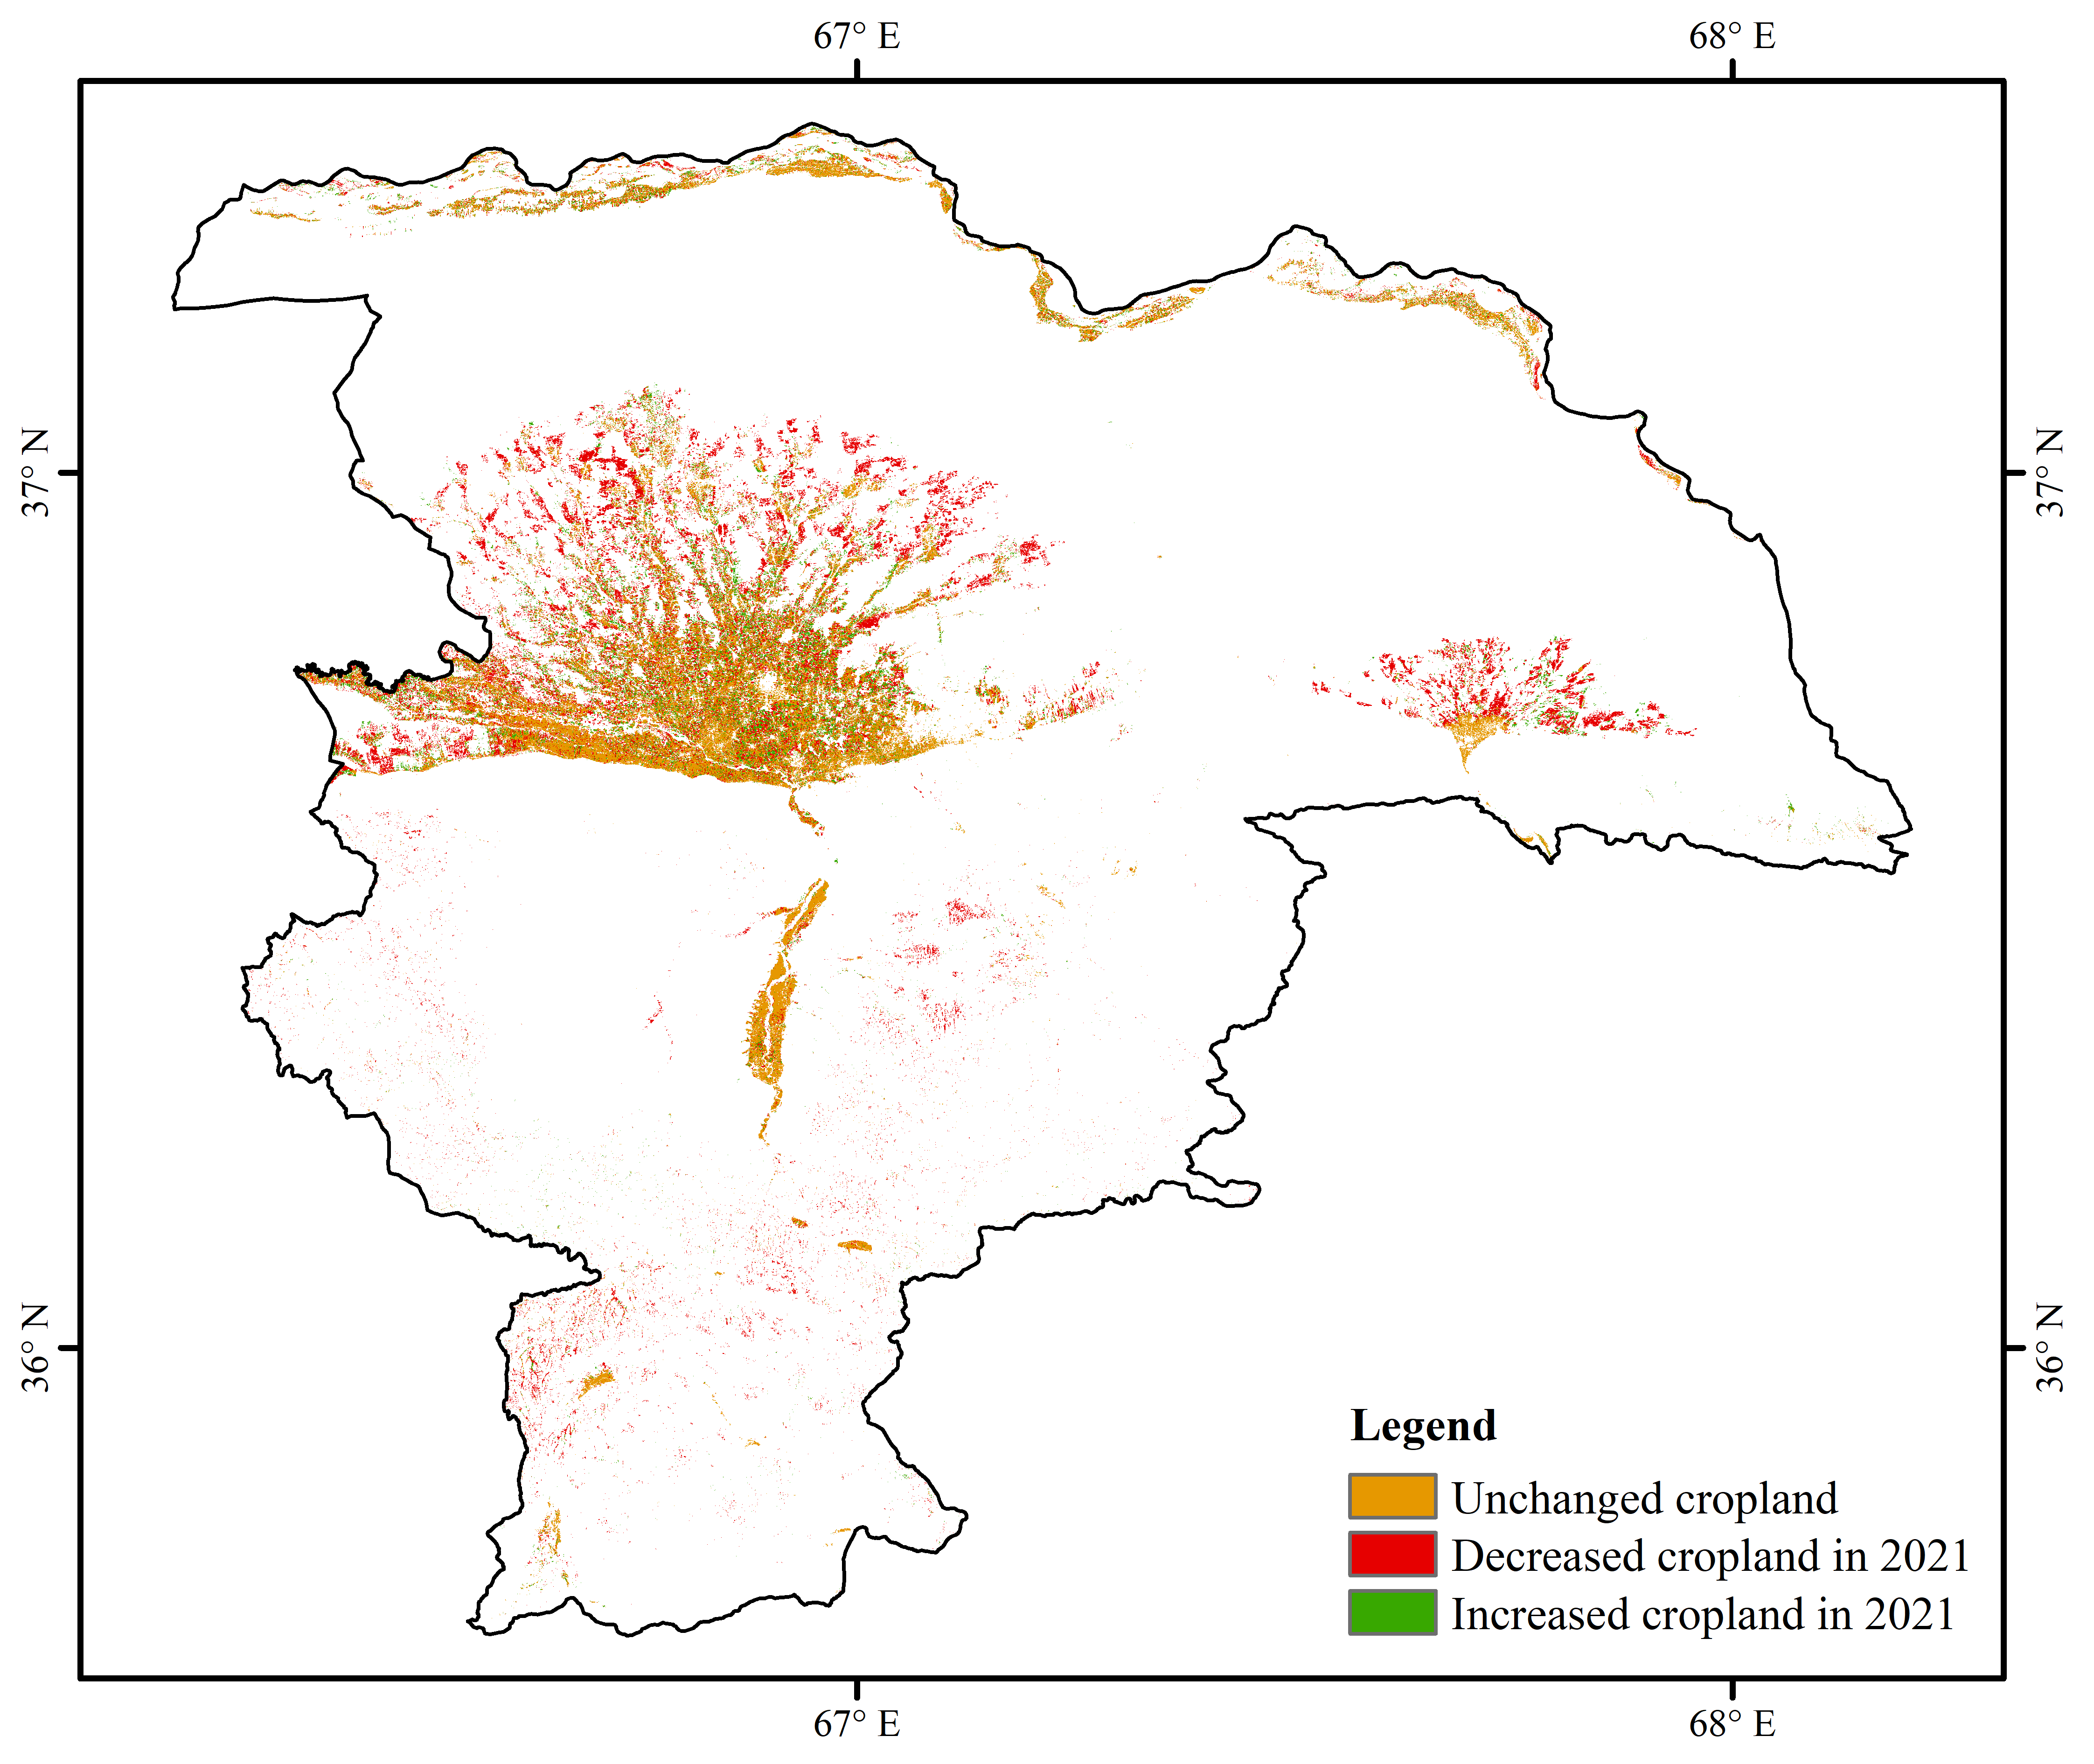 |
| March | April |

Figure S4. Monthly cultivated land change of January-April in Balkh Province, Afghanistan. The monthly change maps denote the unchanged, decreased, and increased cropland in 2021 compared to 2020.

| 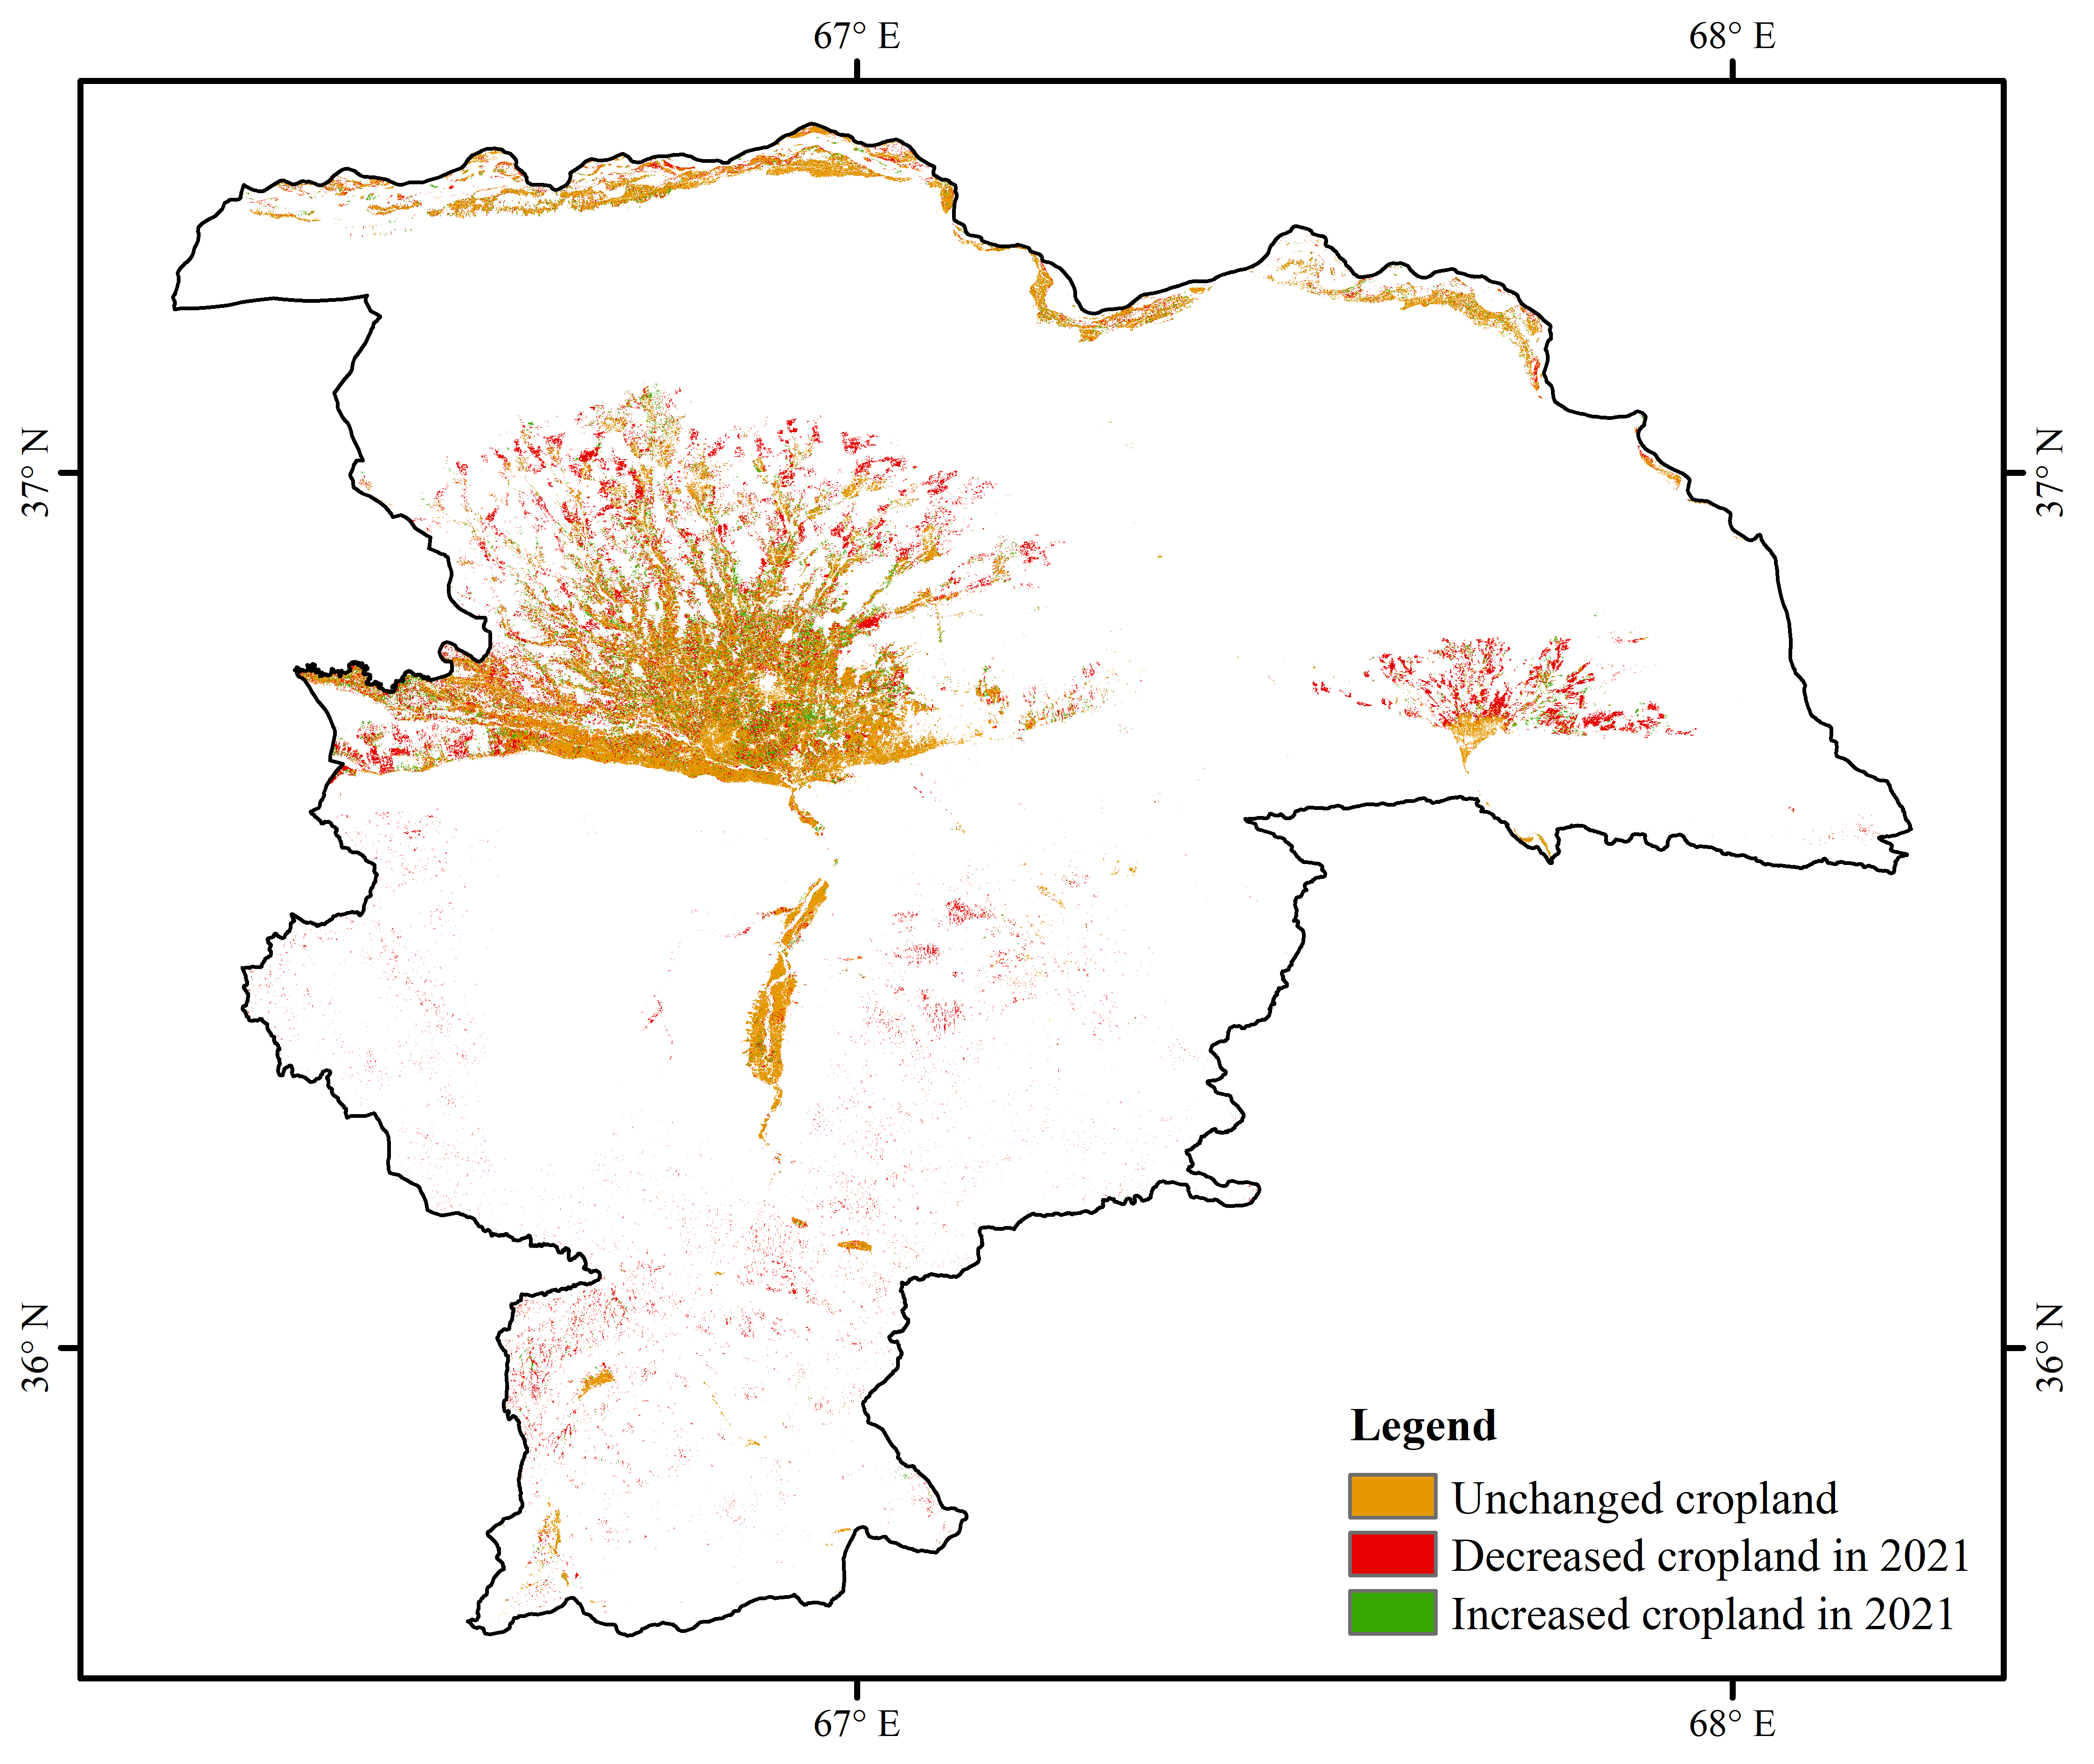 | 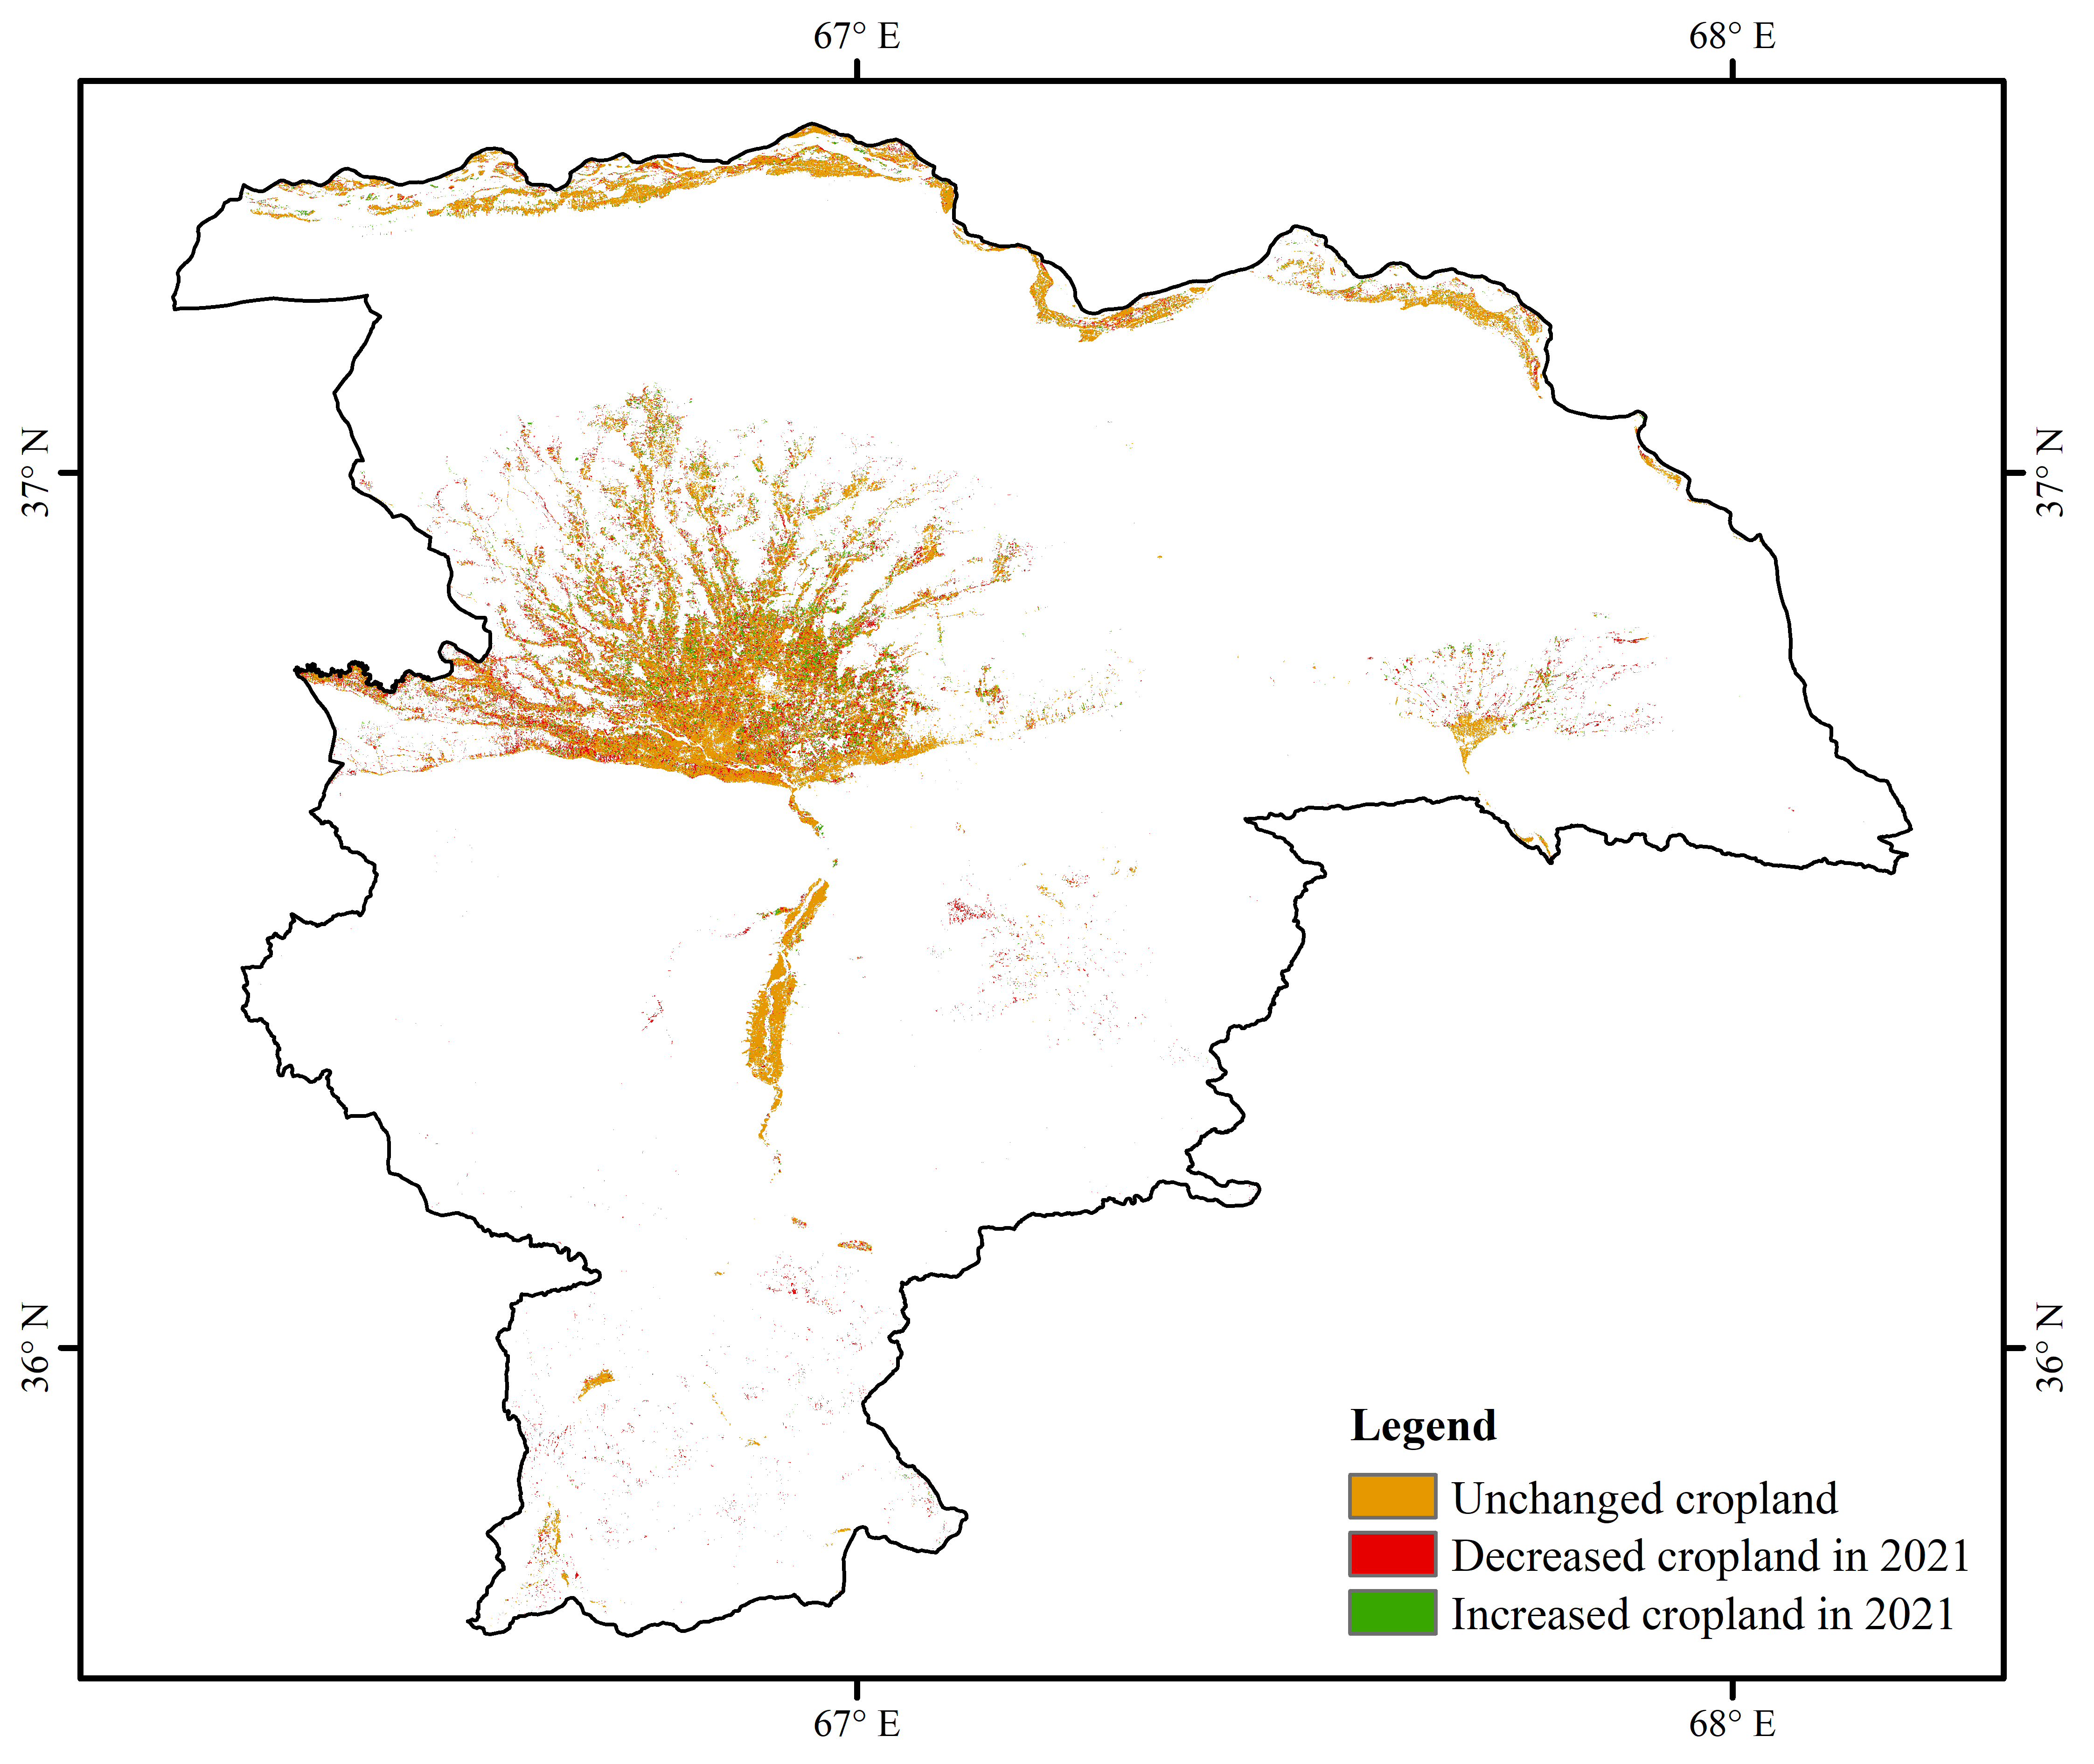 |
| --- | --- |
| May | June |
| 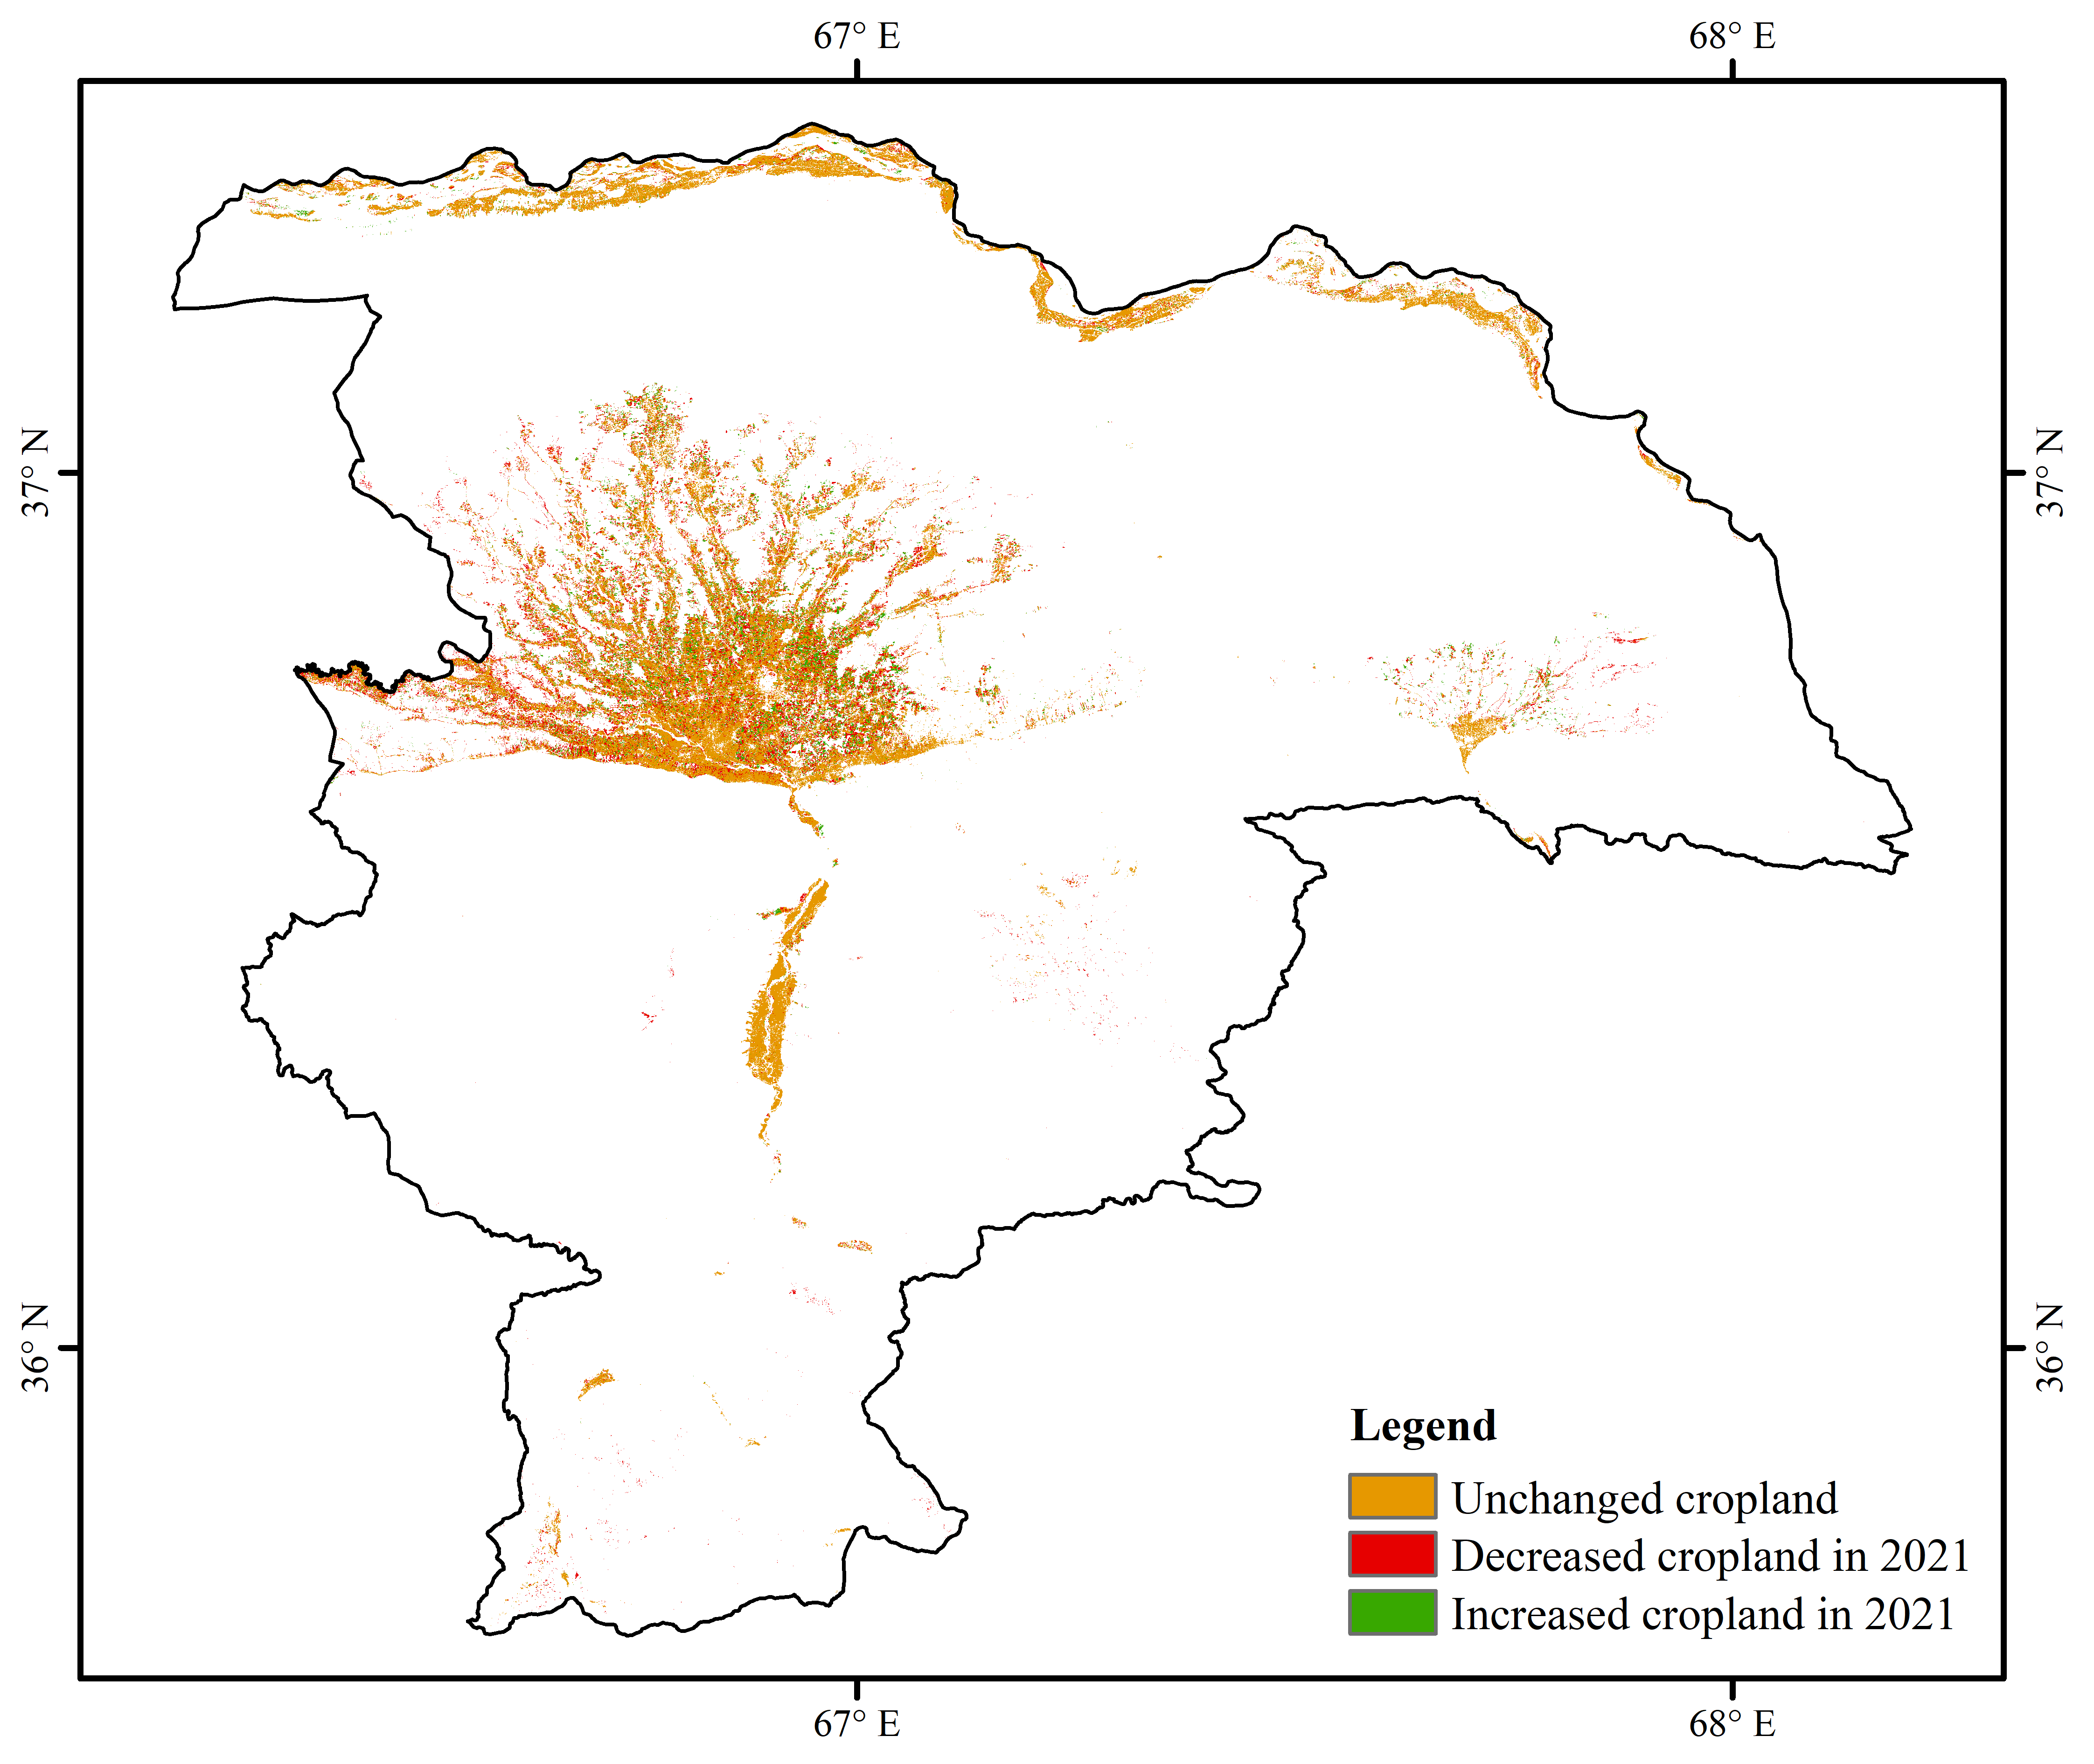 | 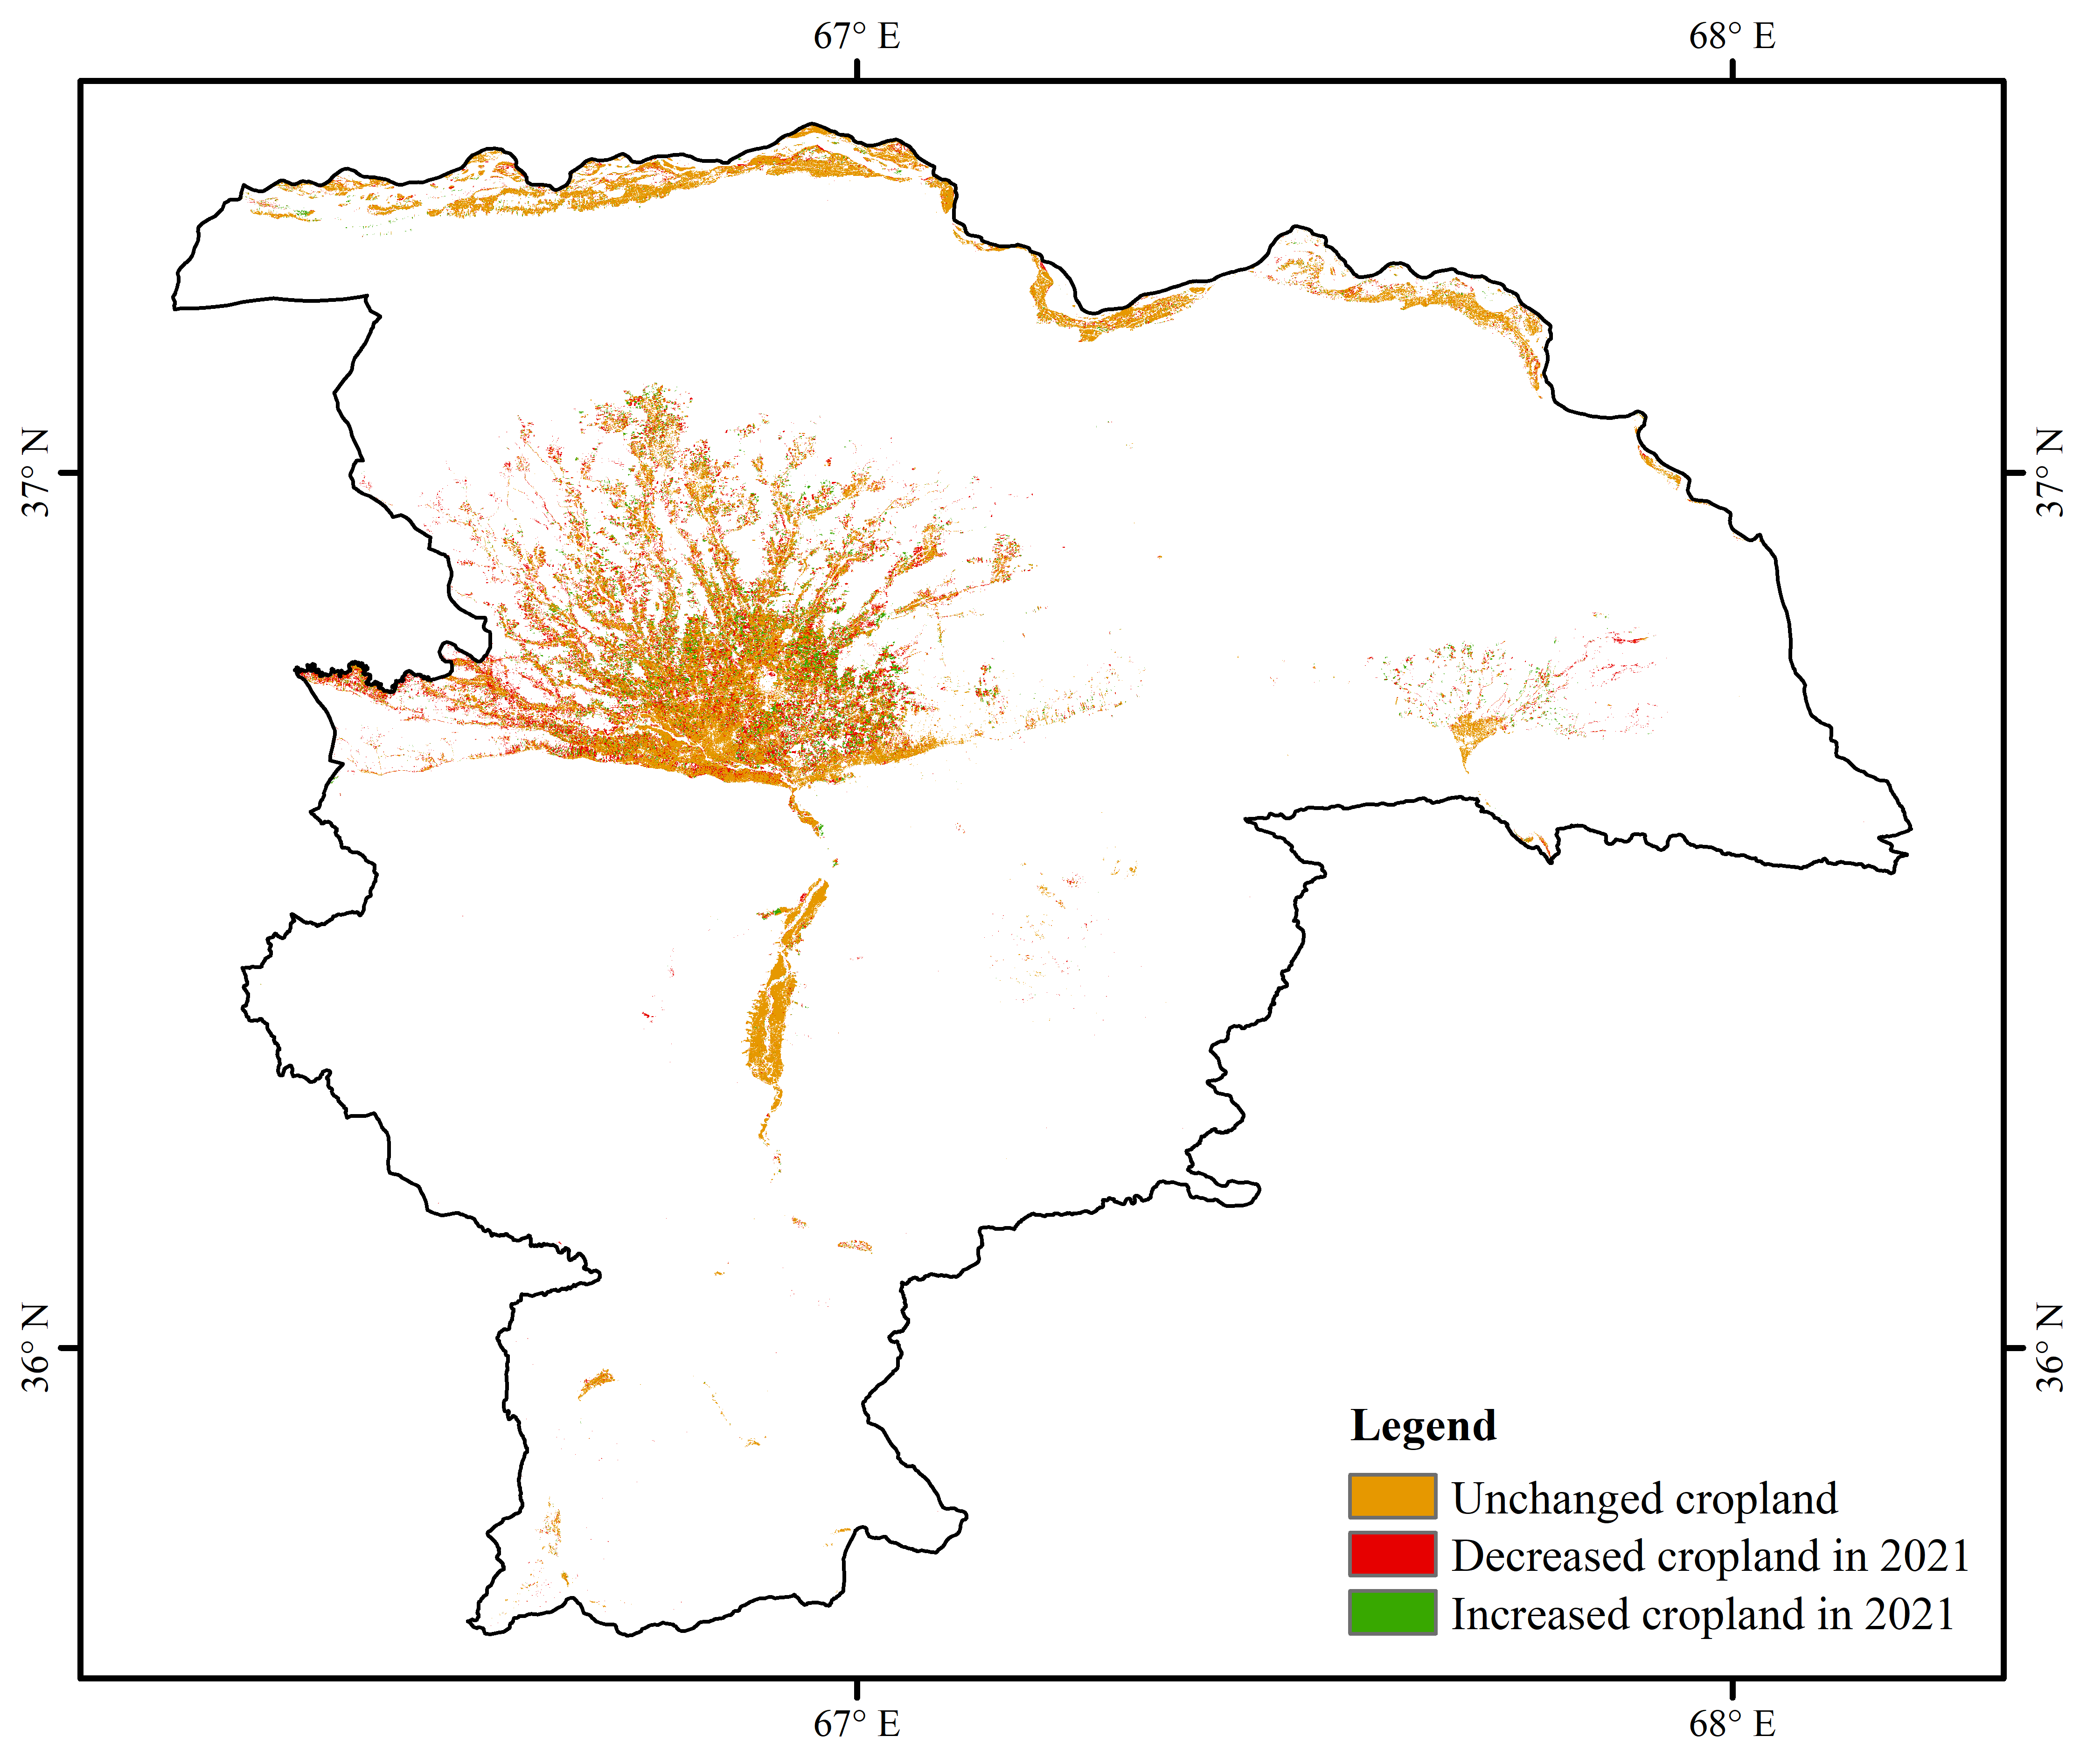 |
| July | August |
| 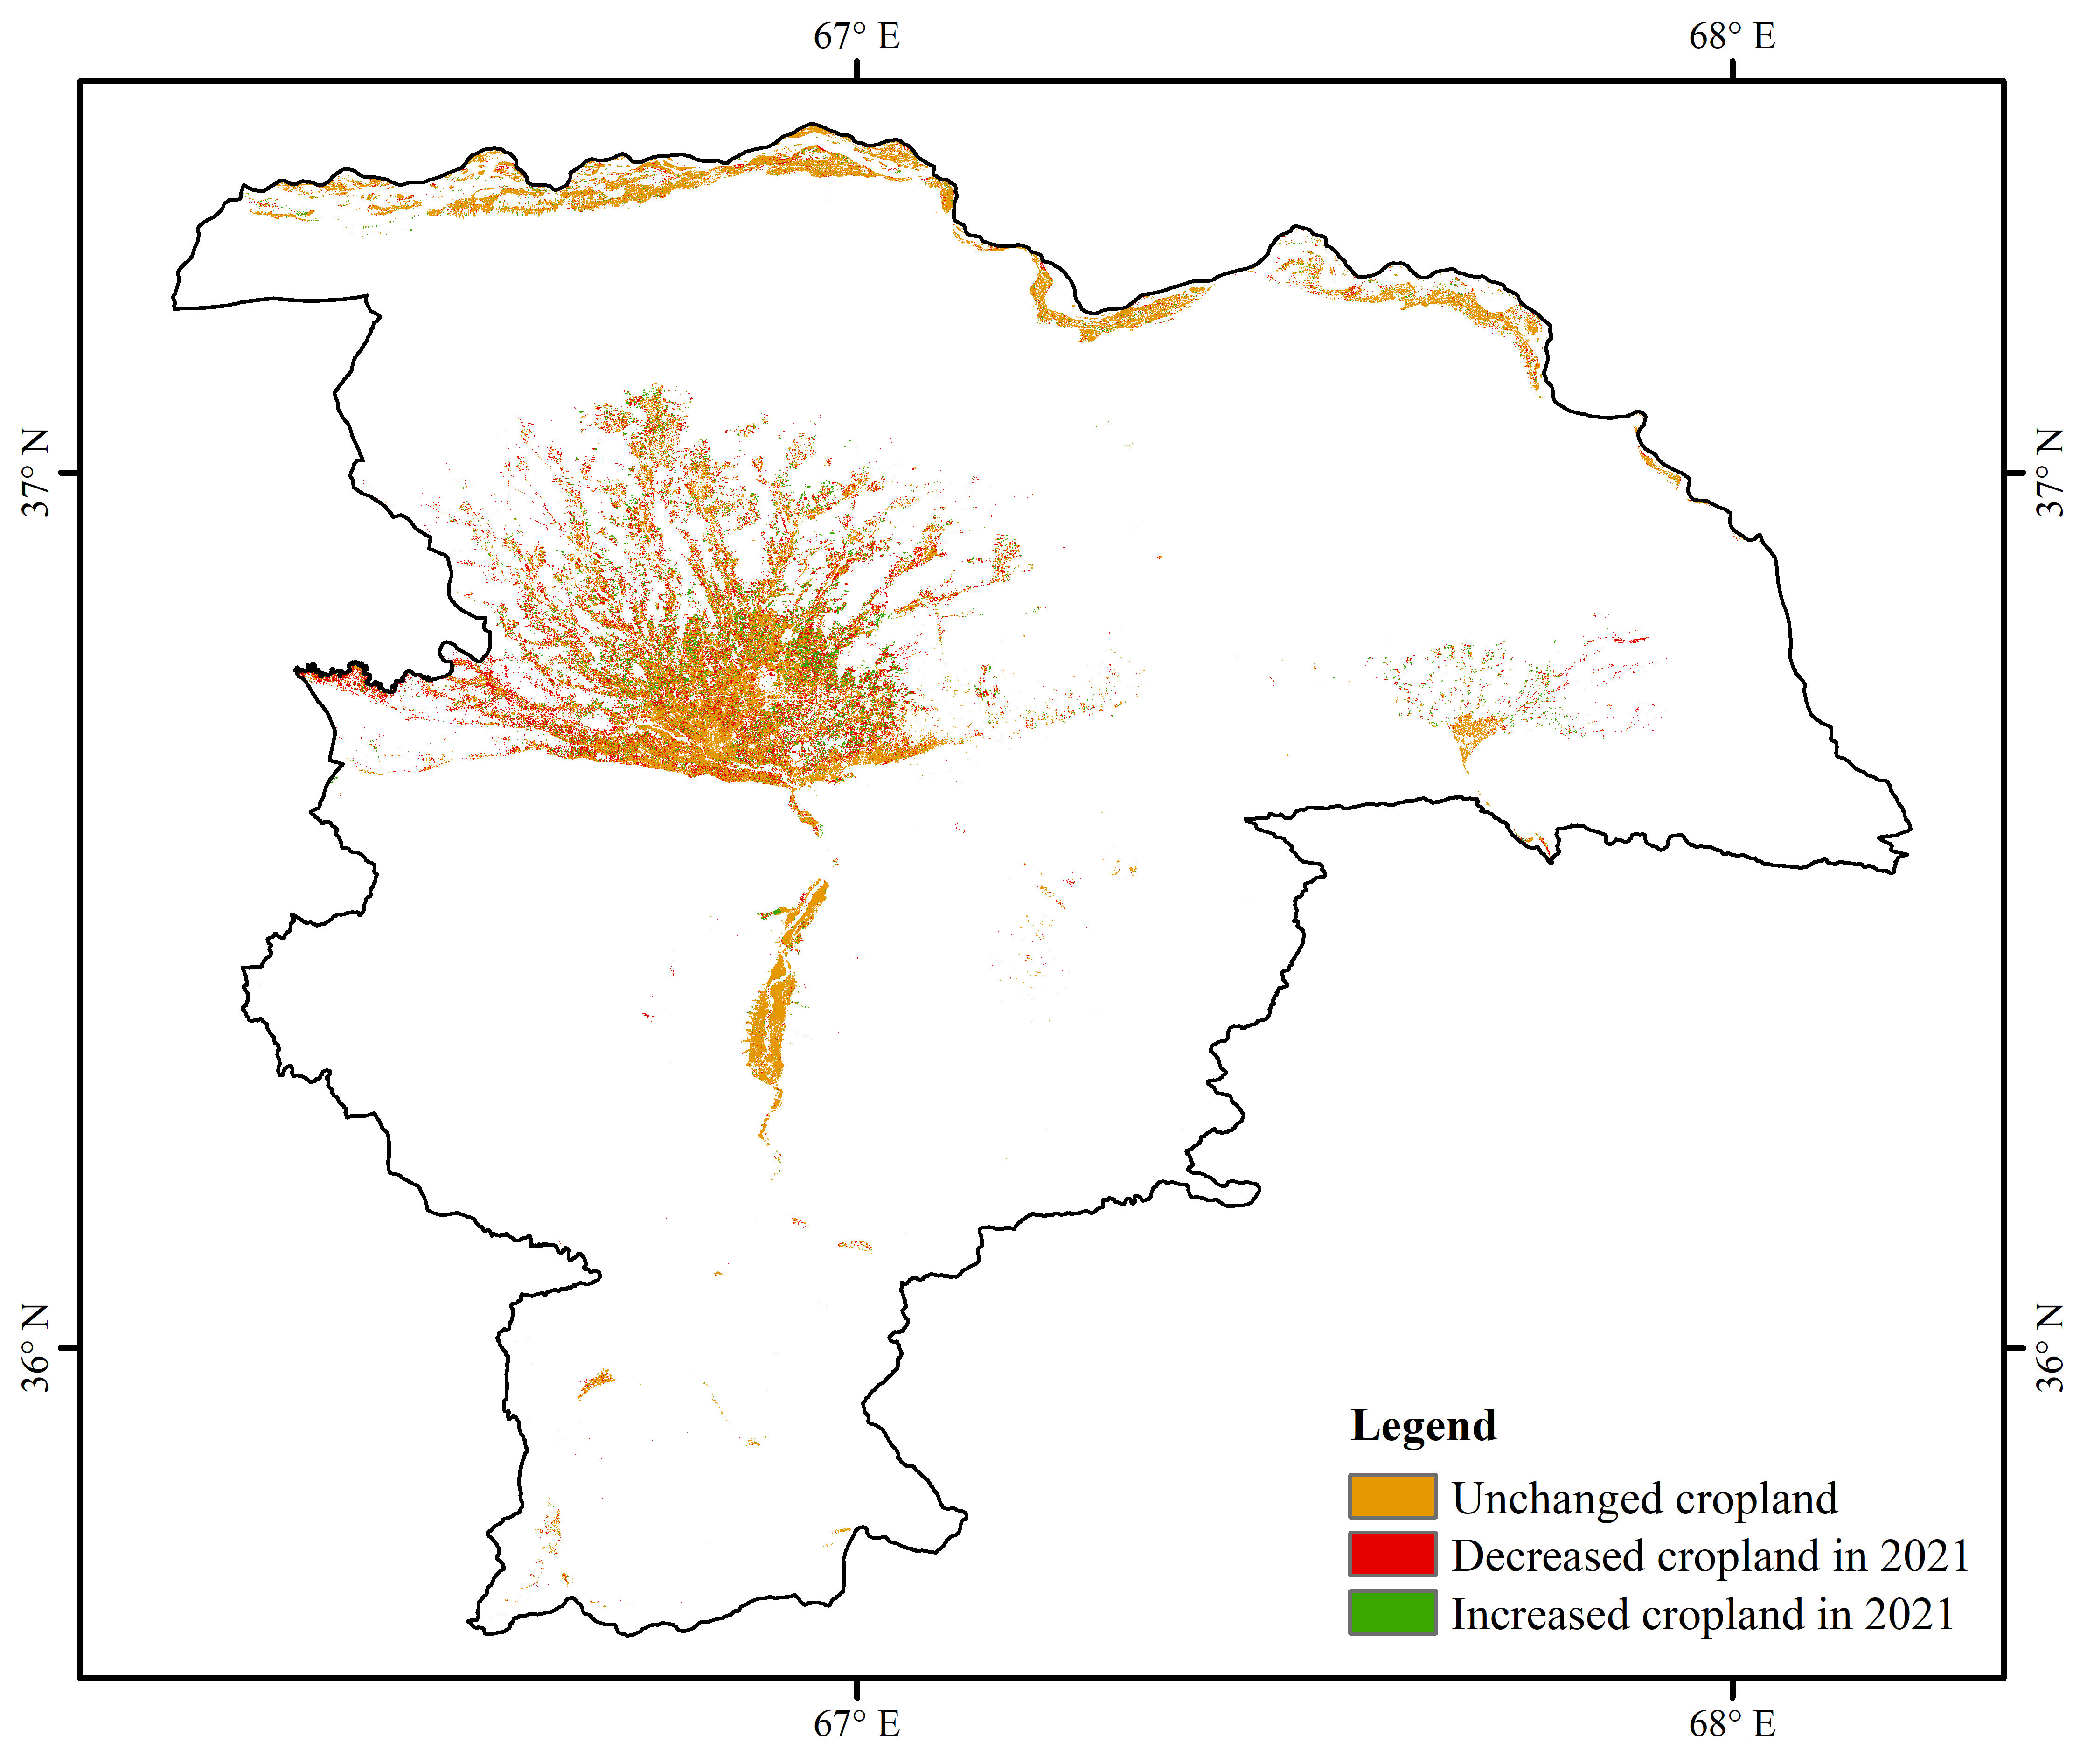 | 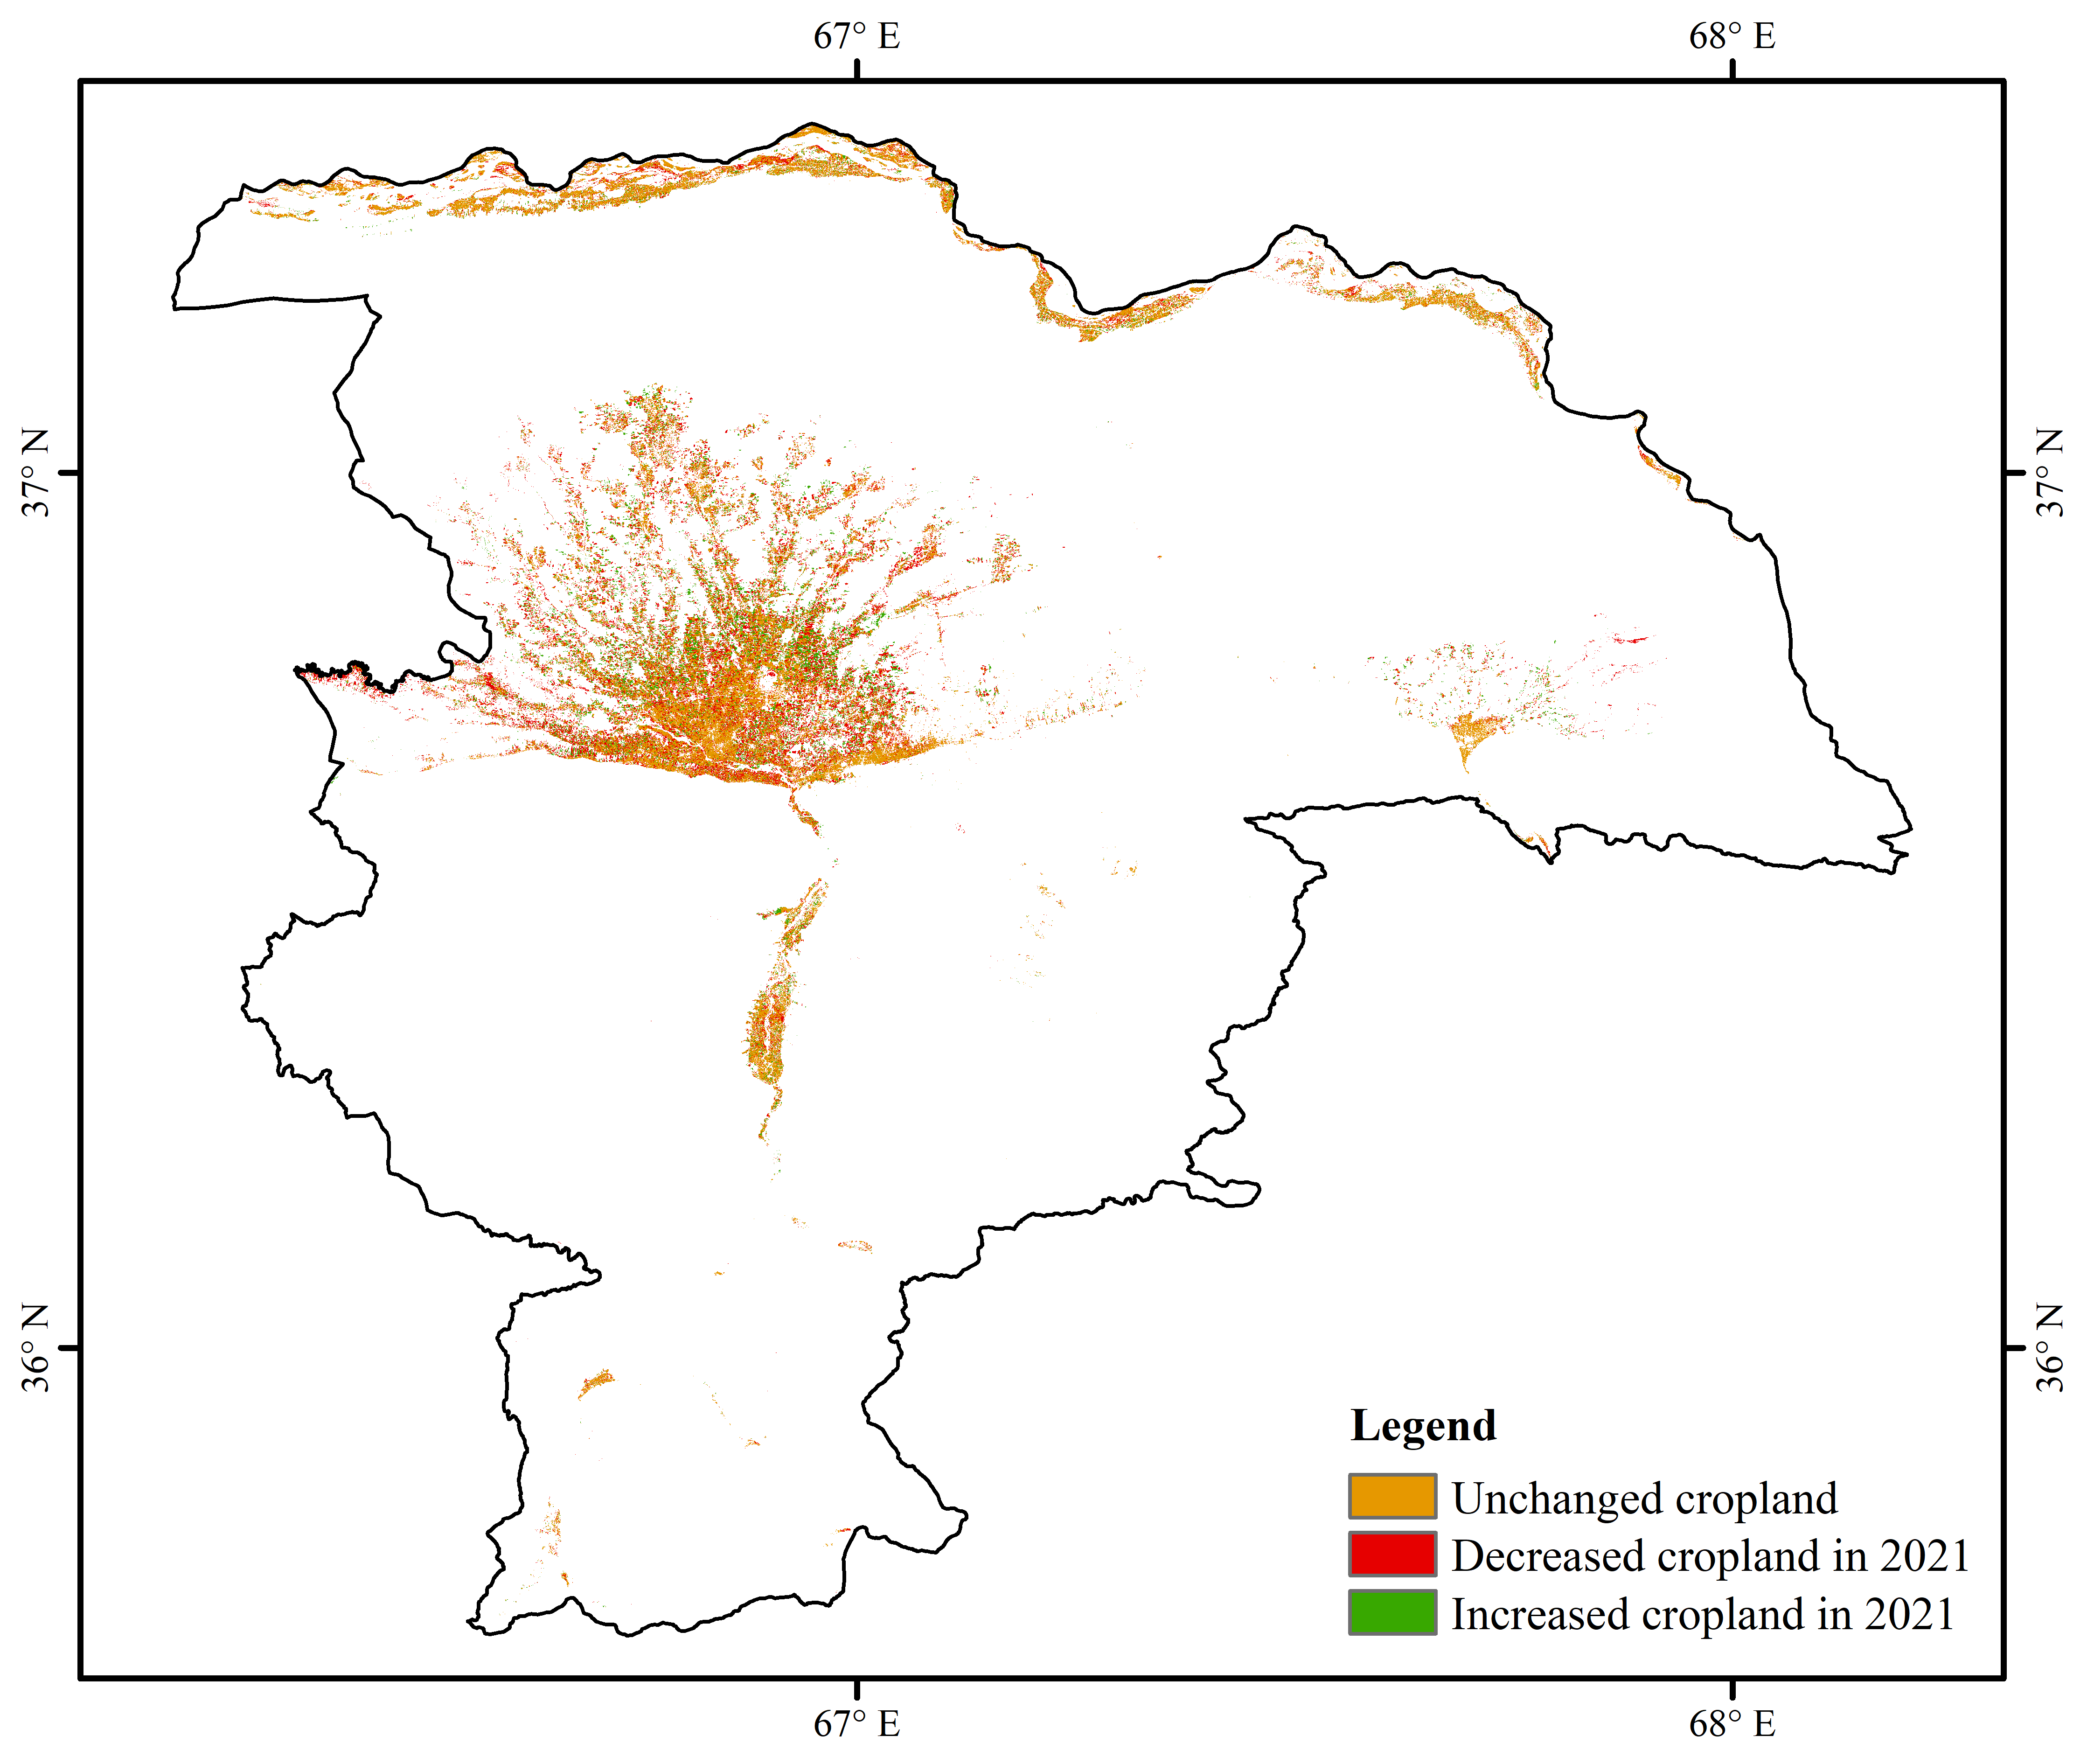 |
| September | October |

Figure S5. Monthly cultivated land change of May-October in Balkh Province, Afghanistan. The monthly change maps denote the unchanged, decreased, and increased cropland in 2021 compared to 2020.

Figure S6. Examples of multi-resolution land cover maps in Beijing, China. The lower half of the figure are zoomed in areas from “A” labeled in the Google Earth image.

Figure S7. Examples of multi-resolution land cover maps in Taiyuan, China. The lower half of the figure are zoomed in areas from “A” labeled in the Google Earth image.

Figure S8. Examples of multi-resolution land cover maps in New York, U. S. The lower half of the figure are zoomed in areas from “A” labeled in the Google Earth image.

| 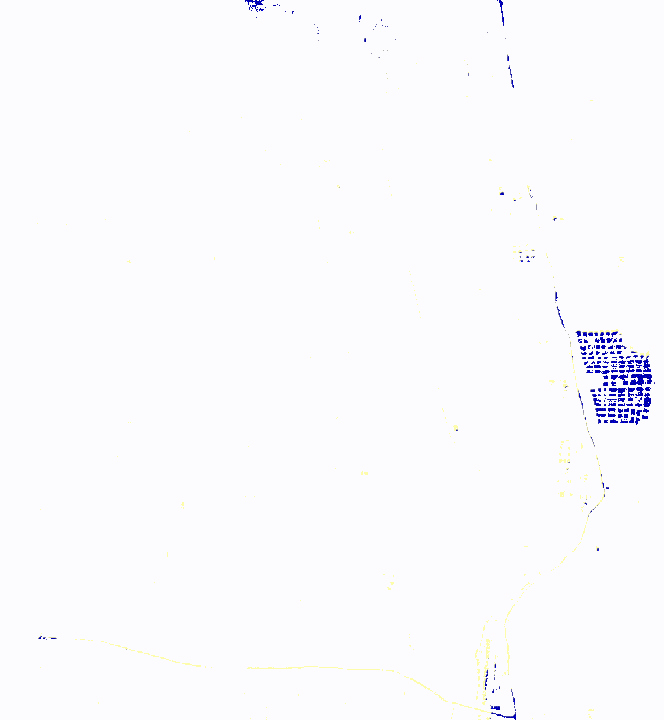 | 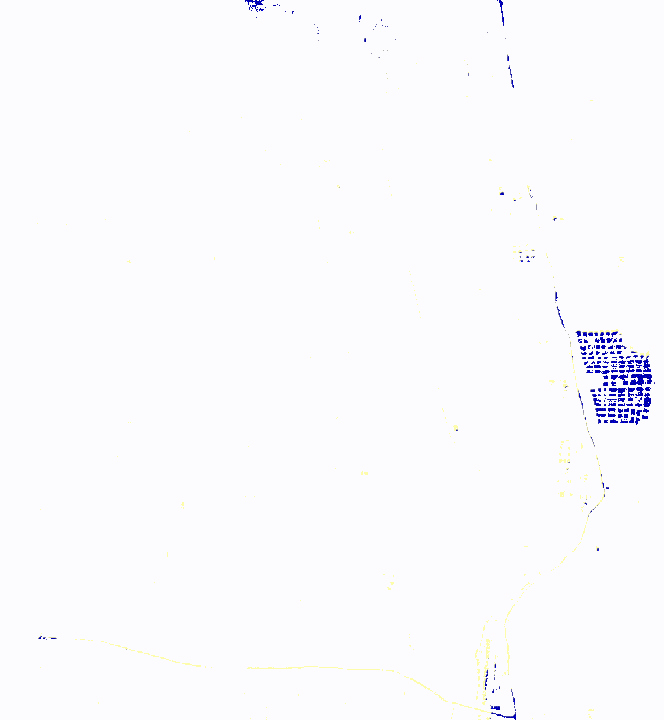 | 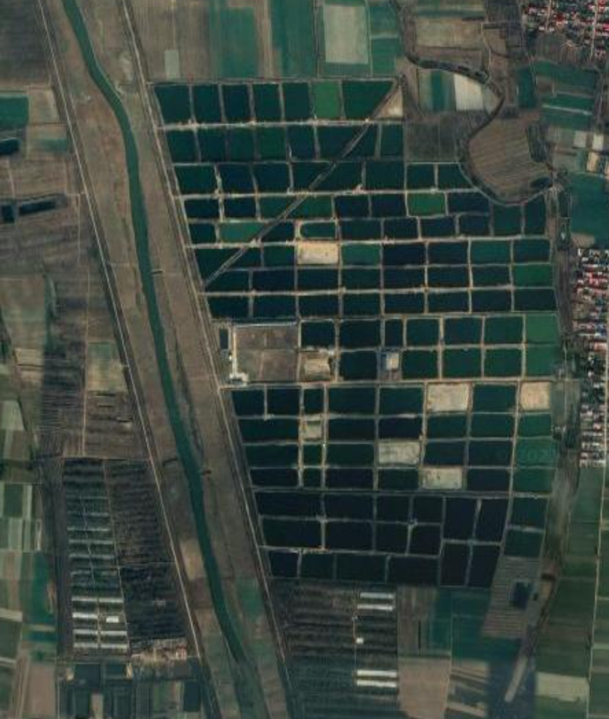 |
| --- | --- | --- |
| 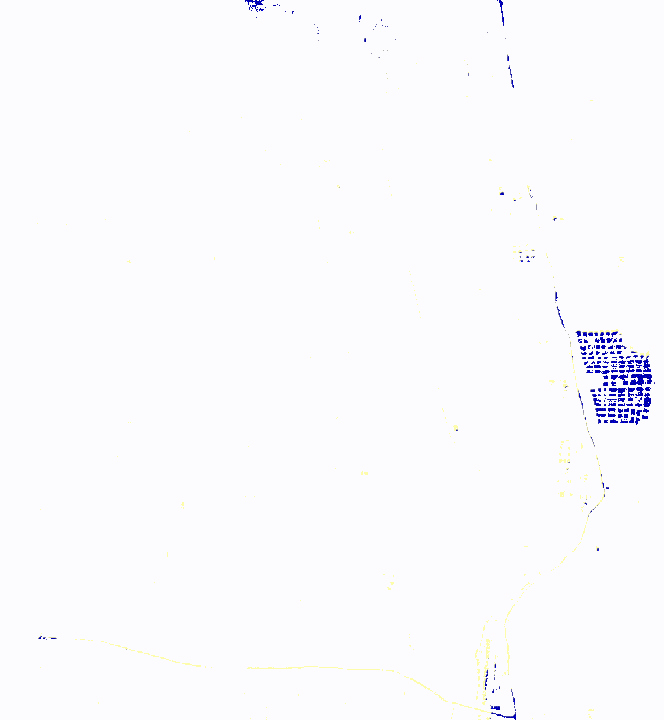 | 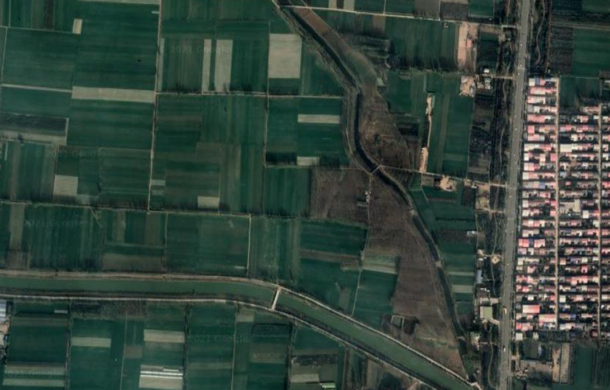 |
| 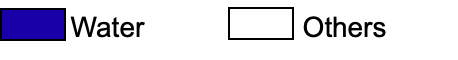 | | |

Figure S9. GIF for the example in Figure 11: near real-time daily change monitoring of water bodies with super resolution (4 times, 2.5 m) during 2021.07.15–2021.08.20 in Weishi, Henan, China.


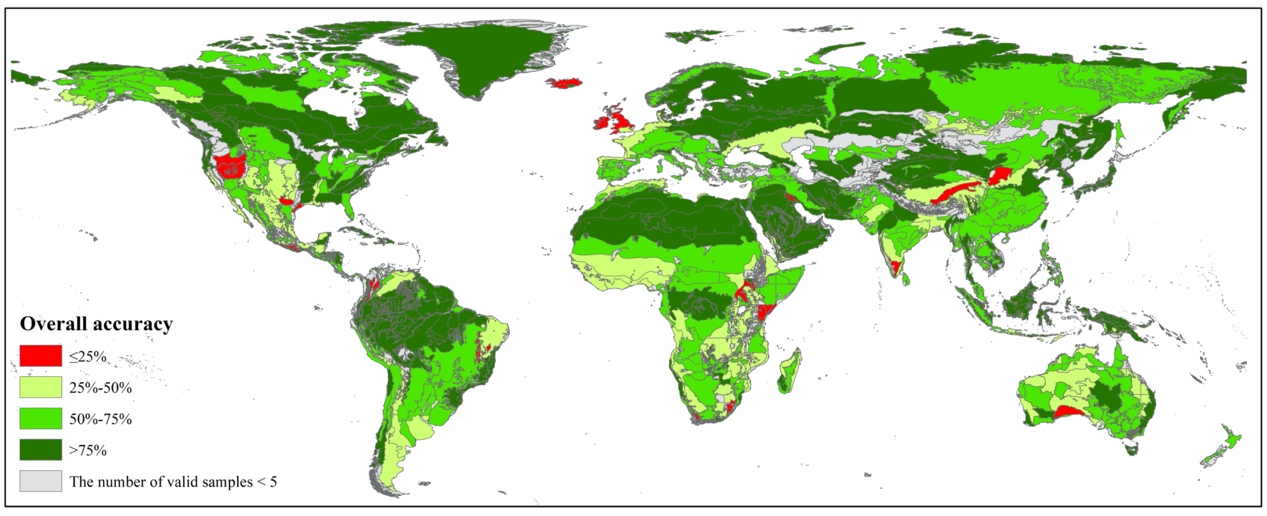


Figure S10. The error map of global 10-m land cover classification results.


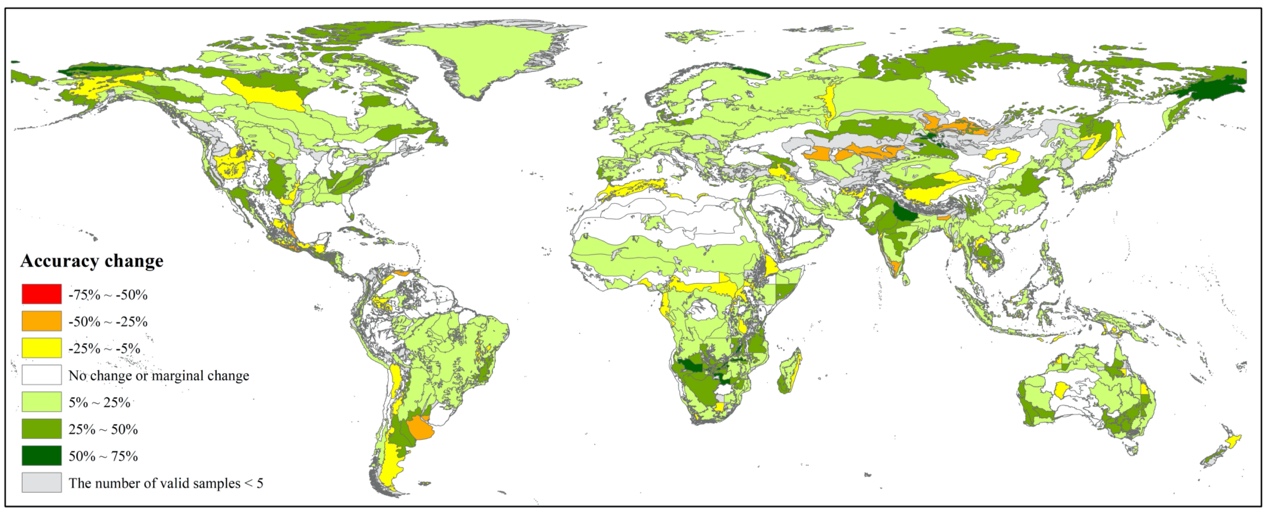


Figure S11. Overall accuracy changes between global 10-m land cover maps developed with images from January and January–November at the ecoregion level.

Table S1. Confusion matrix for the 30-m global land cover map in 2021.

|  | C | F | G | S | WE | W | T | I | B | SI | PA |
| --- | --- | --- | --- | --- | --- | --- | --- | --- | --- | --- | --- |
| C | 524 | 193 | 178 | 97 | 1 | 0 | 0 | 73 | 20 | 1 | 48.21% |
| F | 69 | 3357 | 58 | 174 | 0 | 1 | 0 | 21 | 0 | 20 | 90.73% |
| G | 114 | 162 | 607 | 294 | 2 | 0 | 0 | 93 | 199 | 4 | 41.15% |
| S | 80 | 345 | 298 | 1091 | 4 | 2 | 0 | 159 | 183 | 0 | 50.46% |
| WE | 5 | 29 | 7 | 8 | 3 | 7 | 0 | 4 | 3 | 2 | 4.41% |
| W | 0 | 4 | 0 | 0 | 2 | 102 | 0 | 0 | 0 | 1 | 93.58% |
| T | 2 | 1 | 0 | 0 | 0 | 0 | 776 | 4 | 0 | 283 | 72.80% |
| I | 39 | 17 | 13 | 1 | 0 | 0 | 0 | 178 | 6 | 11 | 67.17% |
| B | 12 | 3 | 85 | 47 | 0 | 5 | 0 | 84 | 3211 | 1 | 93.13% |
| SI | 5 | 10 | 4 | 4 | 0 | 10 | 208 | 37 | 7 | 1342 | 82.48% |
| UA | 61.65% | 81.46% | 48.56% | 63.58% | 25.00% | 80.31% | 78.86% | 27.26% | 88.48% | 80.60% | 74.57% |

* C: Cropland, F: Forest, G: Grassland, S: Shrubland, WE: Wetland, W: Water, T: Tundra, I: Impervious, B: Bareland, SI: Snow/Ice. UA: User’s Accuracy, PA: Producer’s Accuracy.

Table S2. Confusion matrix for the 10-m global land cover map in 2021.

|  | C | F | G | S | WE | W | T | I | B | SI | PA |
| --- | --- | --- | --- | --- | --- | --- | --- | --- | --- | --- | --- |
| C | 450 | 271 | 137 | 96 | 1 | 0 | 0 | 59 | 24 | 4 | 43.19% |
| F | 63 | 3189 | 40 | 155 | 0 | 0 | 0 | 21 | 0 | 17 | 91.51% |
| G | 122 | 200 | 493 | 309 | 0 | 0 | 0 | 115 | 189 | 6 | 34.38% |
| S | 103 | 359 | 290 | 1001 | 1 | 1 | 0 | 136 | 212 | 1 | 47.58% |
| WE | 3 | 22 | 6 | 12 | 1 | 12 | 0 | 4 | 3 | 0 | 1.59% |
| W | 0 | 1 | 0 | 0 | 0 | 122 | 0 | 0 | 0 | 0 | 99.19% |
| T | 1 | 10 | 0 | 0 | 0 | 0 | 879 | 4 | 0 | 359 | 70.15% |
| I | 22 | 23 | 12 | 7 | 0 | 0 | 0 | 184 | 11 | 9 | 68.66% |
| B | 11 | 2 | 91 | 50 | 0 | 5 | 0 | 158 | 3123 | 3 | 90.71% |
| SI | 3 | 26 | 4 | 12 | 0 | 25 | 229 | 71 | 5 | 1354 | 78.31% |
| UA | 57.84% | 77.72% | 45.95% | 60.96% | 33.33% | 73.94% | 79.33% | 24.47% | 87.55% | 77.24% | 72.24% |

* C: Cropland, F: Forest, G: Grassland, S: Shrubland, WE: Wetland, W: Water, T: Tundra, I: Impervious, B: Bareland, SI: Snow/Ice. UA: User’s Accuracy, PA: Producer’s Accuracy.

Table S3. Confusion matrix for the 30-m global land cover map in 2021 with FLUXNET site data.

|  | C | F | G | S | WE | W | T | I | B | SI | PA |
| --- | --- | --- | --- | --- | --- | --- | --- | --- | --- | --- | --- |
| C | 12 | 2 | 0 | 0 | 0 | 0 | 0 | 2 | 0 | 0 | 75.00% |
| F | 2 | 164 | 4 | 9 | 0 | 0 | 1 | 2 | 0 | 0 | 90.11% |
| G | 3 | 7 | 23 | 4 | 0 | 0 | 0 | 4 | 1 | 0 | 54.76% |
| S | 1 | 2 | 1 | 9 | 0 | 0 | 0 | 0 | 1 | 0 | 64.29% |
| WE | 1 | 4 | 1 | 1 | 0 | 1 | 0 | 1 | 0 | 0 | 0.00% |
| W | 0 | 0 | 0 | 0 | 0 | 1 | 0 | 0 | 0 | 0 | 100.00% |
| T | 0 | 0 | 0 | 0 | 0 | 0 | 22 | 0 | 0 | 0 | 100.00% |
| I | 1 | 1 | 0 | 0 | 0 | 0 | 0 | 19 | 0 | 0 | 90.48% |
| B | 0 | 0 | 0 | 0 | 0 | 0 | 0 | 0 | 0 | 0 | 0.00% |
| SI | 0 | 0 | 0 | 0 | 0 | 0 | 0 | 0 | 0 | 0 | - |
| UA | 60.00% | 91.11% | 79.31% | 39.13% | 0.00% | 50.00% | 95.65% | 67.86% | 0.00% | - | 81.43% |

* C: Cropland, F: Forest, G: Grassland, S: Shrubland, WE: Wetland, W: Water, T: Tundra, I: Impervious, B: Bareland, SI: Snow/Ice. UA: User’s Accuracy, PA: Producer’s Accuracy.

Table S4. Confusion matrix for the 10-m global land cover map in 2021 with FLUXNET site data.

|  | C | F | G | S | WE | W | T | I | B | SI | PA |
| --- | --- | --- | --- | --- | --- | --- | --- | --- | --- | --- | --- |
| C | 8 | 6 | 0 | 0 | 0 | 0 | 0 | 2 | 0 | 0 | 50.00% |
| F | 0 | 164 | 5 | 11 | 0 | 0 | 1 | 2 | 0 | 0 | 89.62% |
| G | 5 | 11 | 13 | 8 | 0 | 0 | 0 | 5 | 0 | 0 | 30.95% |
| S | 0 | 2 | 2 | 9 | 0 | 0 | 0 | 0 | 1 | 0 | 64.29% |
| WE | 0 | 6 | 0 | 2 | 0 | 1 | 0 | 0 | 0 | 0 | 0.00% |
| W | 0 | 0 | 0 | 0 | 0 | 1 | 0 | 0 | 0 | 0 | 100.00% |
| T | 0 | 0 | 0 | 0 | 0 | 0 | 22 | 0 | 0 | 0 | 100.00% |
| I | 1 | 1 | 0 | 1 | 0 | 0 | 0 | 18 | 0 | 0 | 85.71% |
| B | 0 | 0 | 0 | 0 | 0 | 0 | 0 | 0 | 0 | 0 | 0.00% |
| SI | 0 | 0 | 0 | 0 | 0 | 0 | 0 | 0 | 0 | 0 | - |
| UA | 57.14% | 86.32% | 65.00% | 29.03% | 0.00% | 50.00% | 95.65% | 66.67% | 0.00% | - | 76.30% |

* C: Cropland, F: Forest, G: Grassland, S: Shrubland, WE: Wetland, W: Water, T: Tundra, I: Impervious, B: Bareland, SI: Snow/Ice. UA: User’s Accuracy, PA: Producer’s Accuracy.
